# Supplementary material
Source: ML conference proceedings conference paper supplement (https://proceedings.neurips.cc/paper_files/paper/2023/hash/3e0b96206965f5f05b0b4550c0e73ff0-Abstract.html)
Supplement: Supplementary file 1 [file 3e0b96206965f5f05b0b4550c0e73ff0-Supplemental-Conference.pdf]

## Appendix

This is the appendix of the paper ”Quantification of Uncertainty with Adversarial Models”. It consists of three sections. In view of the increasing influence of contemporary machine learning research on the broader public, section [A](#) gives a societal impact statement. Following to this, section [B](#) gives details of our theoretical results, foremost about the measure of uncertainty used throughout our work. Furthermore, Mixture Importance Sampling for variance reduction is discussed. Finally, section [C](#) gives details about the experiments presented in the main paper, as well as further experiments.

### Contents of the Appendix

|                                                                                     |           |
|-------------------------------------------------------------------------------------|-----------|
| <b>A Societal Impact Statement</b>                                                  | <b>18</b> |
| <b>B Theoretical Results</b>                                                        | <b>19</b> |
| B.1 Measuring Predictive Uncertainty . . . . .                                      | 19        |
| B.1.1 Entropy and Cross-Entropy as Measures of Predictive Uncertainty . . . . .     | 19        |
| B.1.2 Classification . . . . .                                                      | 20        |
| B.1.3 Regression . . . . .                                                          | 22        |
| B.2 Mixture Importance Sampling for Variance Reduction . . . . .                    | 23        |
| <b>C Experimental Details and Further Experiments</b>                               | <b>27</b> |
| C.1 Details on the Adversarial Model Search . . . . .                               | 27        |
| C.2 Simplex Example . . . . .                                                       | 28        |
| C.3 Epistemic Uncertainty on Synthetic Dataset . . . . .                            | 29        |
| C.4 Epistemic Uncertainty on Vision Datasets . . . . .                              | 29        |
| C.4.1 MNIST . . . . .                                                               | 31        |
| C.4.2 ImageNet . . . . .                                                            | 31        |
| C.5 Comparing Mechanistic Similarity of Deep Ensembles vs. Adversarial Models . . . | 38        |
| C.6 Prediction Space Similarity of Deep Ensembles and Adversarial Models . . . . .  | 38        |
| C.7 Computational Expenses . . . . .                                                | 38        |

### List of Figures

|                                                                                        |    |
|----------------------------------------------------------------------------------------|----|
| B.1 Asymptotic variance for multimodal target and unimodal sampling distribution . . . | 26 |
| C.1 Illustrative example of QUAM . . . . .                                             | 27 |
| C.2 HMC and Adversarial Model Search on simplex . . . . .                              | 28 |
| C.3 Epistemic uncertainty (setting (b)) on synthetic classification dataset . . . . .  | 30 |
| C.4 Model variance of different methods on toy regression dataset . . . . .            | 30 |
| C.5 Histograms MNIST . . . . .                                                         | 33 |
| C.6 Calibration on ImageNet . . . . .                                                  | 34 |
| C.7 Histograms ImageNet . . . . .                                                      | 36 |
| C.8 Detailed results of ImageNet experiments . . . . .                                 | 37 |
| C.9 Comparing mechanistic similarity of Deep Ensembles vs. Adversarial Models . . .    | 39 |
| C.10 Prediction Space Similarity of Deep Ensembles vs. Adversarial Models . . . . .    | 39 |

## List of Tables

|                                                                   |    |
|-------------------------------------------------------------------|----|
| C.1 Results for additional baseline (MoLA) . . . . .              | 31 |
| C.2 Detailed results of MNIST OOD detection experiments . . . . . | 32 |
| C.3 Results for calibration on ImageNet . . . . .                 | 34 |
| C.4 Detailed results of ImageNet experiments . . . . .            | 35 |

## A Societal Impact Statement

In this work, we have focused on improving the predictive uncertainty estimation for machine learning models, specifically deep learning models. Our primary goal is to enhance the robustness and reliability of these predictions, which we believe have several positive societal impacts.

1. **Improved decision-making:** By providing more accurate predictive uncertainty estimates, we enable a broad range of stakeholders to make more informed decisions. This could have implications across various sectors, including healthcare, finance, and autonomous vehicles, where decision-making based on machine learning predictions can directly affect human lives and economic stability.
2. **Increased trust in machine learning systems:** By enhancing the reliability of machine learning models, our work may also contribute to increased public trust in these systems. This could foster greater acceptance and integration of machine learning technologies in everyday life, driving societal advancement.
3. **Promotion of responsible machine learning:** Accurate uncertainty estimation is crucial for the responsible deployment of machine learning systems. By advancing this area, our work promotes the use of those methods in an ethical, transparent, and accountable manner.

While we anticipate predominantly positive impacts, it is important to acknowledge potential negative impacts or challenges.

1. **Misinterpretation of uncertainty:** Even with improved uncertainty estimates, there is a risk that these might be misinterpreted or misused, potentially leading to incorrect decisions or unintended consequences. It is vital to couple advancements in this field with improved education and awareness around the interpretation of uncertainty in AI systems.
2. **Increased reliance on machine learning systems:** While increased trust in machine learning systems is beneficial, there is a risk it could lead to over-reliance on these systems, potentially resulting in reduced human oversight or critical thinking. It's important that robustness and reliability improvements don't result in blind trust.
3. **Inequitable distribution of benefits:** As with any technological advancement, there is a risk that the benefits might not be evenly distributed, potentially exacerbating existing societal inequalities. We urge policymakers and practitioners to consider this when implementing our findings.

In conclusion, while our work aims to make significant positive contributions to society, we believe it is essential to consider these potential negative impacts and take steps to mitigate them proactively.

## B Theoretical Results

### B.1 Measuring Predictive Uncertainty

In this section, we first discuss the usage of the entropy and the cross-entropy as measures of predictive uncertainty. Following this, we introduce the two settings (a) and (b) (see Sec. 2) in detail for the predictive distributions of probabilistic models in classification and regression. Finally, we discuss Mixture Importance Sampling for variance reduction of the uncertainty estimator.

#### B.1.1 Entropy and Cross-Entropy as Measures of Predictive Uncertainty

Shannon and Elwood [1948] defines the entropy  $H[\mathbf{p}] = -\sum_{i=1}^N p_i \log p_i$  as a measure of the amount of uncertainty of a discrete probability distribution  $\mathbf{p} = (p_1, \dots, p_N)$  and states that it measures how much "choice" is involved in the selection of a class  $i$ . See also Jaynes [1957], Cover and Thomas [2006] for an elaboration on this topic. The value  $-\log p_i$  has been called "surprisal" [Tribus, 1961] (page 64, Subsection 2.9.1) and has been used in computational linguistics [Hale, 2001]. Hence, the entropy is the expected or mean surprisal. Instead of "surprisal" also the terms "information content", "self-information", or "Shannon information" are used.

The cross-entropy  $CE[\mathbf{p}, \mathbf{q}] = -\sum_{i=1}^N p_i \log q_i$  between two discrete probability distributions  $\mathbf{p} = (p_1, \dots, p_N)$  and  $\mathbf{q} = (q_1, \dots, q_N)$  measures the expectation of the surprisal of  $\mathbf{q}$  under distribution  $\mathbf{p}$ . Like the entropy, the cross-entropy is a mean of surprisals, therefore can be considered as a measure to quantify uncertainty. The higher surprisals are on average, the higher the uncertainty. The cross-entropy has increased uncertainty compared to the entropy since more surprising events are expected when selecting events via  $\mathbf{p}$  instead of  $\mathbf{q}$ . Only if those distributions coincide, there is no additional surprisal and the cross-entropy is equal to the entropy of the distributions. The cross-entropy depends on the uncertainty of the two distributions and how different they are. In particular, high surprisal of  $q_i$  and low surprisal of  $p_i$  strongly increase the cross-entropy since unexpected events are more frequent, that is, we are more often surprised. Thus, the cross-entropy does not only measure the uncertainty under distribution  $\mathbf{p}$ , but also the difference of the distributions. The average surprisal via the cross-entropy depends on the uncertainty of  $\mathbf{p}$  and the difference between  $\mathbf{p}$  and  $\mathbf{q}$ :

$$\begin{aligned} CE[\mathbf{p}, \mathbf{q}] &= -\sum_{i=1}^N p_i \log q_i \\ &= -\sum_{i=1}^N p_i \log p_i + \sum_{i=1}^N p_i \log \frac{p_i}{q_i} \\ &= H[\mathbf{p}] + D_{KL}(\mathbf{p} \parallel \mathbf{q}), \end{aligned} \tag{9}$$

where the Kullback-Leibler divergence  $D_{KL}(\cdot \parallel \cdot)$  is

$$D_{KL}(\mathbf{p} \parallel \mathbf{q}) = \sum_{i=1}^N p_i \log \frac{p_i}{q_i}. \tag{10}$$

The Kullback-Leibler divergence measures the difference in the distributions via their average difference of surprisals. Furthermore, it measures the decrease in uncertainty when shifting from the estimate  $\mathbf{p}$  to the true  $\mathbf{q}$  [Seidenfeld, 1986, Adler et al., 2008].

Therefore, the cross-entropy can serve to measure the total uncertainty, where the entropy is used as aleatoric uncertainty and the difference of distributions is used as the epistemic uncertainty. We assume that  $\mathbf{q}$  is the true distribution that is estimated by the distribution  $\mathbf{p}$ . We quantify the total uncertainty of  $\mathbf{p}$  as the sum of the entropy of  $\mathbf{p}$  (aleatoric uncertainty) and the Kullback-Leibler divergence to  $\mathbf{q}$  (epistemic uncertainty). In accordance with Apostolakis [1991] and Helton [1997], the aleatoric uncertainty measures the stochasticity of sampling from  $\mathbf{p}$ , while the epistemic uncertainty measures the deviation of the parameters  $\mathbf{p}$  from the true parameters  $\mathbf{q}$ .

In the context of quantifying uncertainty through probability distributions, other measures such as the variance have been proposed [Zidek and vanEeden, 2003]. For uncertainty estimation in the context of deep learning systems, e.g. Gal [2016], Kendall and Gal [2017], Depeweg et al. [2018] proposed to use the variance of the BMA predictive distribution as a measure of uncertainty. Entropy and variance capture different notions of uncertainty and investigating measures based on the variance of the predictive distribution is an interesting avenue for future work.

### B.1.2 Classification

**Setting (a): Expected uncertainty when selecting a model.** We assume to have training data  $\mathcal{D}$  and an input  $\mathbf{x}$ . We want to know the uncertainty in predicting a class  $\mathbf{y}$  from  $\mathbf{x}$  when we first choose a model  $\tilde{\mathbf{w}}$  based on the posterior  $p(\tilde{\mathbf{w}} \mid \mathcal{D})$  and then use the chosen model  $\tilde{\mathbf{w}}$  to choose a class for input  $\mathbf{x}$  according to the predictive distribution  $p(\mathbf{y} \mid \mathbf{x}, \tilde{\mathbf{w}})$ . The uncertainty in predicting the class arises from choosing a model (epistemic) and from choosing a class using this probabilistic model (aleatoric).

Through Bayesian model averaging, we obtain the following probability of selecting a class:

$$p(\mathbf{y} \mid \mathbf{x}, \mathcal{D}) = \int_{\mathcal{W}} p(\mathbf{y} \mid \mathbf{x}, \tilde{\mathbf{w}}) p(\tilde{\mathbf{w}} \mid \mathcal{D}) d\tilde{\mathbf{w}}. \quad (11)$$

The total uncertainty is commonly measured as the entropy of this probability distribution [Houlsby et al., 2011, Gal, 2016, Depeweg et al., 2018, Hüllermeier and Waegeman, 2021]:

$$H[p(\mathbf{y} \mid \mathbf{x}, \mathcal{D})]. \quad (12)$$

We can reformulate the total uncertainty as the expected cross-entropy:

$$\begin{aligned} H[p(\mathbf{y} \mid \mathbf{x}, \mathcal{D})] &= - \sum_{\mathbf{y} \in \mathcal{Y}} p(\mathbf{y} \mid \mathbf{x}, \mathcal{D}) \log p(\mathbf{y} \mid \mathbf{x}, \mathcal{D}) \\ &= - \sum_{\mathbf{y} \in \mathcal{Y}} \log p(\mathbf{y} \mid \mathbf{x}, \mathcal{D}) \int_{\mathcal{W}} p(\mathbf{y} \mid \mathbf{x}, \tilde{\mathbf{w}}) p(\tilde{\mathbf{w}} \mid \mathcal{D}) d\tilde{\mathbf{w}} \\ &= \int_{\mathcal{W}} \left( - \sum_{\mathbf{y} \in \mathcal{Y}} p(\mathbf{y} \mid \mathbf{x}, \tilde{\mathbf{w}}) \log p(\mathbf{y} \mid \mathbf{x}, \mathcal{D}) \right) p(\tilde{\mathbf{w}} \mid \mathcal{D}) d\tilde{\mathbf{w}} \\ &= \int_{\mathcal{W}} \text{CE}[p(\mathbf{y} \mid \mathbf{x}, \tilde{\mathbf{w}}), p(\mathbf{y} \mid \mathbf{x}, \mathcal{D})] p(\tilde{\mathbf{w}} \mid \mathcal{D}) d\tilde{\mathbf{w}}. \end{aligned} \quad (13)$$

We can split the total uncertainty into the aleatoric and epistemic uncertainty [Houlsby et al., 2011, Gal, 2016, Smith and Gal, 2018]:

$$\begin{aligned} &\int_{\mathcal{W}} \text{CE}[p(\mathbf{y} \mid \mathbf{x}, \tilde{\mathbf{w}}), p(\mathbf{y} \mid \mathbf{x}, \mathcal{D})] p(\tilde{\mathbf{w}} \mid \mathcal{D}) d\tilde{\mathbf{w}} \\ &= \int_{\mathcal{W}} (H[p(\mathbf{y} \mid \mathbf{x}, \tilde{\mathbf{w}})] + D_{\text{KL}}(p(\mathbf{y} \mid \mathbf{x}, \tilde{\mathbf{w}}) \parallel p(\mathbf{y} \mid \mathbf{x}, \mathcal{D}))) p(\tilde{\mathbf{w}} \mid \mathcal{D}) d\tilde{\mathbf{w}} \\ &= \int_{\mathcal{W}} H[p(\mathbf{y} \mid \mathbf{x}, \tilde{\mathbf{w}})] p(\tilde{\mathbf{w}} \mid \mathcal{D}) d\tilde{\mathbf{w}} + \int_{\mathcal{W}} D_{\text{KL}}(p(\mathbf{y} \mid \mathbf{x}, \tilde{\mathbf{w}}) \parallel p(\mathbf{y} \mid \mathbf{x}, \mathcal{D})) p(\tilde{\mathbf{w}} \mid \mathcal{D}) d\tilde{\mathbf{w}} \\ &= \int_{\mathcal{W}} H[p(\mathbf{y} \mid \mathbf{x}, \tilde{\mathbf{w}})] p(\tilde{\mathbf{w}} \mid \mathcal{D}) d\tilde{\mathbf{w}} + I[Y; W \mid \mathbf{x}, \mathcal{D}]. \end{aligned} \quad (14)$$

We verify the last equality in Eq. (14), i.e. that the Mutual Information is equal to the expected Kullback-Leibler divergence:

$$\begin{aligned} I[Y; W \mid \mathbf{x}, \mathcal{D}] &= \int_{\mathcal{W}} \sum_{\mathbf{y} \in \mathcal{Y}} p(\mathbf{y}, \tilde{\mathbf{w}} \mid \mathbf{x}, \mathcal{D}) \log \frac{p(\mathbf{y}, \tilde{\mathbf{w}} \mid \mathbf{x}, \mathcal{D})}{p(\mathbf{y} \mid \mathbf{x}, \mathcal{D}) p(\tilde{\mathbf{w}} \mid \mathcal{D})} d\tilde{\mathbf{w}} \\ &= \int_{\mathcal{W}} \sum_{\mathbf{y} \in \mathcal{Y}} p(\mathbf{y} \mid \mathbf{x}, \tilde{\mathbf{w}}) p(\tilde{\mathbf{w}} \mid \mathcal{D}) \log \frac{p(\mathbf{y} \mid \mathbf{x}, \tilde{\mathbf{w}}) p(\tilde{\mathbf{w}} \mid \mathcal{D})}{p(\mathbf{y} \mid \mathbf{x}, \mathcal{D}) p(\tilde{\mathbf{w}} \mid \mathcal{D})} d\tilde{\mathbf{w}} \\ &= \int_{\mathcal{W}} \sum_{\mathbf{y} \in \mathcal{Y}} p(\mathbf{y} \mid \mathbf{x}, \tilde{\mathbf{w}}) \log \frac{p(\mathbf{y} \mid \mathbf{x}, \tilde{\mathbf{w}})}{p(\mathbf{y} \mid \mathbf{x}, \mathcal{D})} p(\tilde{\mathbf{w}} \mid \mathcal{D}) d\tilde{\mathbf{w}} \\ &= \int_{\mathcal{W}} D_{\text{KL}}(p(\mathbf{y} \mid \mathbf{x}, \tilde{\mathbf{w}}) \parallel p(\mathbf{y} \mid \mathbf{x}, \mathcal{D})) p(\tilde{\mathbf{w}} \mid \mathcal{D}) d\tilde{\mathbf{w}}. \end{aligned} \quad (15)$$

This is possible because the label is dependent on the selected model. First, a model is selected, then a label is chosen with the selected model. To summarize, the predictive uncertainty is measured by:

$$\begin{aligned}
H[p(\mathbf{y} | \mathbf{x}, \mathcal{D})] &= \int_{\mathcal{W}} H[p(\mathbf{y} | \mathbf{x}, \tilde{\mathbf{w}})] p(\tilde{\mathbf{w}} | \mathcal{D}) d\tilde{\mathbf{w}} + I[Y; W | \mathbf{x}, \mathcal{D}] \\
&= \int_{\mathcal{W}} H[p(\mathbf{y} | \mathbf{x}, \tilde{\mathbf{w}})] p(\tilde{\mathbf{w}} | \mathcal{D}) d\tilde{\mathbf{w}} \\
&\quad + \int_{\mathcal{W}} D_{\text{KL}}(p(\mathbf{y} | \mathbf{x}, \tilde{\mathbf{w}}) \| p(\mathbf{y} | \mathbf{x}, \mathcal{D})) p(\tilde{\mathbf{w}} | \mathcal{D}) d\tilde{\mathbf{w}} \\
&= \int_{\mathcal{W}} \text{CE}[p(\mathbf{y} | \mathbf{x}, \tilde{\mathbf{w}}), p(\mathbf{y} | \mathbf{x}, \mathcal{D})] p(\tilde{\mathbf{w}} | \mathcal{D}) d\tilde{\mathbf{w}} .
\end{aligned} \tag{16}$$

The total uncertainty is given by the entropy of the Bayesian model average predictive distribution, which we showed is equal to the expected cross-entropy between the predictive distributions of candidate models  $\tilde{\mathbf{w}}$  selected according to the posterior and the Bayesian model average predictive distribution. The aleatoric uncertainty is the expected entropy of candidate models drawn from the posterior, which can also be interpreted as the entropy we expect when selecting a model according to the posterior. Therefore, if all models likely under the posterior have low surprisal, the aleatoric uncertainty in this setting is low. The epistemic uncertainty is the expected KL divergence between the predictive distributions of candidate models and the Bayesian model average predictive distribution. Therefore, if all models likely under the posterior have low divergence of their predictive distribution to the Bayesian model average predictive distribution, the epistemic uncertainty in this setting is low.

**Setting (b): Uncertainty of a given, pre-selected model.** We assume to have training data  $\mathcal{D}$ , an input  $\mathbf{x}$ , and a given, pre-selected model with parameters  $\mathbf{w}$  and predictive distribution  $p(\mathbf{y} | \mathbf{x}, \mathbf{w})$ . Using the predictive distribution of the model, a class  $\mathbf{y}$  is selected based on  $\mathbf{x}$ , therefore there is uncertainty about which  $\mathbf{y}$  is selected. Furthermore, we assume that the true model with predictive distribution  $p(\mathbf{y} | \mathbf{x}, \mathbf{w}^*)$  and parameters  $\mathbf{w}^*$  has generated the training data  $\mathcal{D}$  and will also generate the observed (real world)  $\mathbf{y}^*$  from  $\mathbf{x}$  that we want to predict. The true model is only revealed later, e.g. via more samples or by receiving knowledge about  $\mathbf{w}^*$ . Hence, there is uncertainty about the parameters of the true model. Revealing the true model is viewed as drawing a true model from all possible true models according to their agreement with  $\mathcal{D}$ . Note, to reveal the true model is not necessary in our framework but helpful for the intuition of drawing a true model. We neither consider uncertainty about the model class nor the modeling nor about the training data. In summary, there is uncertainty about drawing a class from the predictive distribution of the given, pre-selected model and uncertainty about drawing the true parameters of the model distribution.

According to [Apostolakis \[1991\]](#) and [Helton \[1997\]](#), the aleatoric uncertainty is the variability of selecting a class  $\mathbf{y}$  via  $p(\mathbf{y} | \mathbf{x}, \mathbf{w})$ . Using the entropy, the aleatoric uncertainty is

$$H[p(\mathbf{y} | \mathbf{x}, \mathbf{w})] . \tag{17}$$

Also according to [Apostolakis \[1991\]](#) and [Helton \[1997\]](#), the epistemic uncertainty is the uncertainty about the parameters  $\mathbf{w}$  of the distribution, that is, a difference measure between  $\mathbf{w}$  and the true parameters  $\mathbf{w}^*$ . We use as a measure for the epistemic uncertainty the Kullback-Leibler divergence:

$$D_{\text{KL}}(p(\mathbf{y} | \mathbf{x}, \mathbf{w}) \| p(\mathbf{y} | \mathbf{x}, \mathbf{w}^*)) . \tag{18}$$

The total uncertainty is the aleatoric uncertainty plus the epistemic uncertainty, which is the cross-entropy between  $p(\mathbf{y} | \mathbf{x}, \mathbf{w})$  and  $p(\mathbf{y} | \mathbf{x}, \mathbf{w}^*)$ :

$$\text{CE}[p(\mathbf{y} | \mathbf{x}, \mathbf{w}), p(\mathbf{y} | \mathbf{x}, \mathbf{w}^*)] = H[p(\mathbf{y} | \mathbf{x}, \mathbf{w})] + D_{\text{KL}}(p(\mathbf{y} | \mathbf{x}, \mathbf{w}) \| p(\mathbf{y} | \mathbf{x}, \mathbf{w}^*)) . \tag{19}$$

However, we do not know the true parameters  $\mathbf{w}^*$ . The posterior  $p(\tilde{\mathbf{w}} | \mathcal{D})$  gives us the likelihood of  $\tilde{\mathbf{w}}$  being the true parameters  $\mathbf{w}^*$ . We assume that the true model is revealed later. Therefore we use the expected Kullback-Leibler divergence for the epistemic uncertainty:

$$\int_{\mathcal{W}} D_{\text{KL}}(p(\mathbf{y} | \mathbf{x}, \mathbf{w}) \| p(\mathbf{y} | \mathbf{x}, \tilde{\mathbf{w}})) p(\tilde{\mathbf{w}} | \mathcal{D}) d\tilde{\mathbf{w}} . \tag{20}$$

Consequently, the total uncertainty is

$$H[p(\mathbf{y} | \mathbf{x}, \mathbf{w})] + \int_{\mathcal{W}} D_{\text{KL}}(p(\mathbf{y} | \mathbf{x}, \mathbf{w}) \| p(\mathbf{y} | \mathbf{x}, \tilde{\mathbf{w}})) p(\tilde{\mathbf{w}} | \mathcal{D}) d\tilde{\mathbf{w}} . \tag{21}$$

The total uncertainty can therefore be expressed by the expected cross-entropy as it was in setting (a) (see Eq. (16)), but between  $p(\mathbf{y} \mid \mathbf{x}, \mathbf{w})$  and  $p(\mathbf{y} \mid \mathbf{x}, \tilde{\mathbf{w}})$ :

$$\begin{aligned} & \int_{\mathcal{W}} \text{CE}[p(\mathbf{y} \mid \mathbf{x}, \mathbf{w}), p(\mathbf{y} \mid \mathbf{x}, \tilde{\mathbf{w}})] p(\tilde{\mathbf{w}} \mid \mathcal{D}) d\tilde{\mathbf{w}} \\ &= \int_{\mathcal{W}} (\text{H}[p(\mathbf{y} \mid \mathbf{x}, \mathbf{w})] + \text{D}_{\text{KL}}(p(\mathbf{y} \mid \mathbf{x}, \mathbf{w}) \parallel p(\mathbf{y} \mid \mathbf{x}, \tilde{\mathbf{w}}))) p(\tilde{\mathbf{w}} \mid \mathcal{D}) d\tilde{\mathbf{w}} \\ &= \text{H}[p(\mathbf{y} \mid \mathbf{x}, \mathbf{w})] + \int_{\mathcal{W}} \text{D}_{\text{KL}}(p(\mathbf{y} \mid \mathbf{x}, \mathbf{w}) \parallel p(\mathbf{y} \mid \mathbf{x}, \tilde{\mathbf{w}})) p(\tilde{\mathbf{w}} \mid \mathcal{D}) d\tilde{\mathbf{w}}. \end{aligned} \quad (22)$$

### B.1.3 Regression

We follow Depeweg et al. [2018] and measure the predictive uncertainty in a regression setting using the differential entropy  $\text{H}[p(y \mid \mathbf{x}, \mathbf{w})] = - \int_{\mathcal{Y}} p(y \mid \mathbf{x}, \mathbf{w}) \log p(y \mid \mathbf{x}, \mathbf{w}) dy$  of the predictive distribution  $p(y \mid \mathbf{x}, \mathbf{w})$  of a probabilistic model. In the following, we assume that we are modeling a Gaussian distribution, but other continuous probability distributions e.g. a Laplace lead to similar results. The model thus has to provide estimators for the mean  $\mu(\mathbf{x}, \mathbf{w})$  and variance  $\sigma^2(\mathbf{x}, \mathbf{w})$  of the Gaussian. The predictive distribution is given by

$$p(y \mid \mathbf{x}, \mathbf{w}) = (2\pi \sigma^2(\mathbf{x}, \mathbf{w}))^{-\frac{1}{2}} \exp \left\{ - \frac{(y - \mu(\mathbf{x}, \mathbf{w}))^2}{2 \sigma^2(\mathbf{x}, \mathbf{w})} \right\}. \quad (23)$$

The differential entropy of a Gaussian distribution is given by

$$\begin{aligned} \text{H}[p(y \mid \mathbf{x}, \mathbf{w})] &= - \int_{\mathcal{Y}} p(y \mid \mathbf{x}, \mathbf{w}) \log p(y \mid \mathbf{x}, \mathbf{w}) dy \\ &= \frac{1}{2} \log(\sigma^2(\mathbf{x}, \mathbf{w})) + \log(2\pi) + \frac{1}{2}. \end{aligned} \quad (24)$$

The KL divergence between two Gaussian distributions is given by

$$\begin{aligned} & \text{D}_{\text{KL}}(p(y \mid \mathbf{x}, \mathbf{w}) \parallel p(y \mid \mathbf{x}, \tilde{\mathbf{w}})) \\ &= - \int_{\mathcal{Y}} p(y \mid \mathbf{x}, \mathbf{w}) \log \left( \frac{p(y \mid \mathbf{x}, \mathbf{w})}{p(y \mid \mathbf{x}, \tilde{\mathbf{w}})} \right) dy \\ &= \frac{1}{2} \log \left( \frac{\sigma^2(\mathbf{x}, \tilde{\mathbf{w}})}{\sigma^2(\mathbf{x}, \mathbf{w})} \right) + \frac{\sigma^2(\mathbf{x}, \mathbf{w}) + (\mu(\mathbf{x}, \mathbf{w}) - \mu(\mathbf{x}, \tilde{\mathbf{w}}))^2}{2 \sigma^2(\mathbf{x}, \tilde{\mathbf{w}})} - \frac{1}{2}. \end{aligned} \quad (25)$$

**Setting (a): Expected uncertainty when selecting a model.** Depeweg et al. [2018] consider the differential entropy of the Bayesian model average  $p(y \mid \mathbf{x}, \mathcal{D}) = \int_{\mathcal{W}} p(y \mid \mathbf{x}, \tilde{\mathbf{w}}) p(\tilde{\mathbf{w}} \mid \mathcal{D}) d\tilde{\mathbf{w}}$ , which is equal to the expected cross-entropy and can be decomposed into the expected differential entropy and Kullback-Leibler divergence. Therefore, the expected uncertainty when selecting a model is given by

$$\begin{aligned} & \int_{\mathcal{W}} \text{CE}[p(y \mid \mathbf{x}, \tilde{\mathbf{w}}), p(y \mid \mathbf{x}, \mathcal{D})] p(\tilde{\mathbf{w}} \mid \mathcal{D}) d\tilde{\mathbf{w}} = \text{H}[p(y \mid \mathbf{x}, \mathcal{D})] \\ &= \int_{\mathcal{W}} \text{H}[p(y \mid \mathbf{x}, \tilde{\mathbf{w}})] p(\tilde{\mathbf{w}} \mid \mathcal{D}) d\tilde{\mathbf{w}} + \int_{\mathcal{W}} \text{D}_{\text{KL}}(p(y \mid \mathbf{x}, \tilde{\mathbf{w}}) \parallel p(y \mid \mathbf{x}, \mathcal{D})) p(\tilde{\mathbf{w}} \mid \mathcal{D}) d\tilde{\mathbf{w}} \\ &= \int_{\mathcal{W}} \frac{1}{2} \log(\sigma^2(\mathbf{x}, \tilde{\mathbf{w}})) p(\tilde{\mathbf{w}} \mid \mathcal{D}) d\tilde{\mathbf{w}} + \log(2\pi) \\ &+ \int_{\mathcal{W}} \text{D}_{\text{KL}}(p(y \mid \mathbf{x}, \tilde{\mathbf{w}}) \parallel p(y \mid \mathbf{x}, \mathcal{D})) p(\tilde{\mathbf{w}} \mid \mathcal{D}) d\tilde{\mathbf{w}}. \end{aligned} \quad (26)$$

**Setting (b): Uncertainty of a given, pre-selected model.** Synonymous to the classification setting, the uncertainty of a given, pre-selected model  $w$  is given by

$$\begin{aligned}
& \int_{\mathcal{W}} \text{CE}[p(y | x, w), p(y | x, \tilde{w})] p(\tilde{w} | \mathcal{D}) d\tilde{w} \\
&= \mathbb{H}[p(y | x, w)] + \int_{\mathcal{W}} \text{D}_{\text{KL}}(p(y | x, w) \| p(y | x, \tilde{w})) p(\tilde{w} | \mathcal{D}) d\tilde{w} \\
&= \frac{1}{2} \log(\sigma^2(x, w)) + \log(2\pi) \\
&+ \int_{\mathcal{W}} \frac{1}{2} \log\left(\frac{\sigma^2(x, \tilde{w})}{\sigma^2(x, w)}\right) + \frac{\sigma^2(x, w) + (\mu(x, w) - \mu(x, \tilde{w}))^2}{2 \sigma^2(x, w)} p(\tilde{w} | \mathcal{D}) d\tilde{w}.
\end{aligned} \tag{27}$$

**Homoscedastic, Model Invariant Noise.** We assume, that noise is homoscedastic for all inputs  $x \in \mathcal{X}$ , thus  $\sigma^2(x, w) = \sigma^2(w)$ . Furthermore, most models in regression do not explicitly model the variance in their training objective. For such a model  $w$ , we can estimate the variance on a validation dataset  $\mathcal{D}_{\text{val}} = \{(x_n, y_n)\}_{n=1}^N$  as

$$\hat{\sigma}^2(w) = \frac{1}{N} \sum_{n=1}^N (y_n - \mu(x_n, w))^2. \tag{28}$$

If we assume that all reasonable models under the posterior will have similar variances ( $\hat{\sigma}^2(w) \approx \sigma^2(\tilde{w})$  for  $\tilde{w} \sim p(\tilde{w} | \mathcal{D})$ ), the uncertainty of a prediction using the given, pre-selected model  $w$  is given by

$$\begin{aligned}
& \int_{\mathcal{W}} \text{CE}[p(y | x, w), p(y | x, \tilde{w})] p(\tilde{w} | \mathcal{D}) d\tilde{w} \\
&\approx \frac{1}{2} \log(\hat{\sigma}^2(w)) + \log(2\pi) \\
&+ \int_{\mathcal{W}} \frac{1}{2} \log\left(\frac{\hat{\sigma}^2(w)}{\hat{\sigma}^2(w)}\right) + \frac{\hat{\sigma}^2(w) + (\mu(x, w) - \mu(x, \tilde{w}))^2}{2 \hat{\sigma}^2(w)} p(\tilde{w} | \mathcal{D}) d\tilde{w} \\
&= \frac{1}{2} \log(\hat{\sigma}^2(w)) + \frac{1}{\hat{\sigma}^2(w)} \int_{\mathcal{W}} (\mu(x, w) - \mu(x, \tilde{w}))^2 p(\tilde{w} | \mathcal{D}) d\tilde{w} + \frac{1}{2} + \log(2\pi).
\end{aligned} \tag{29}$$

## B.2 Mixture Importance Sampling for Variance Reduction

The epistemic uncertainties in Eq. (1) and Eq. (2) are expectations of KL divergences over the posterior. We have to approximate these integrals.

If the posterior has different modes, a concentrated importance sampling function has a high variance of estimates, therefore converges very slowly [Steele et al., 2006]. Thus, we use mixture importance sampling (MIS) [Hesterberg, 1995]. MIS uses a mixture model for sampling, instead of a unimodal model of standard importance sampling [Owen and Zhou, 2000]. Multiple importance sampling Veach and Guibas [1995] is similar to MIS and equal to it for balanced heuristics [Owen and Zhou, 2000]. More details on these and similar methods can be found in Owen and Zhou [2000], Cappé et al. [2004], Elvira et al. [2015, 2019], Steele et al. [2006], Raftery and Bao [2010]. MIS has been very successfully applied to estimate multimodal densities. For example, the evidence lower bound (ELBO) [Kingma and Welling, 2014] has been improved by multiple importance sampling ELBO [Kviman et al., 2022]. Using a mixture model should ensure that at least one of its components will locally match the shape of the integrand. Often, MIS iteratively enrich the sampling distribution by new modes [Raftery and Bao, 2010].

In contrast to iterative enrichment, which finds modes by chance, we are able to explicitly search for posterior modes, where the integrand of the definition of epistemic uncertainty is large. For each of these modes, we define a component of the mixture from which we then sample. We have the huge advantage to have explicit expressions for the integrand. The integrand of the epistemic uncertainty in Eq. (1) and Eq. (2) has the form

$$\text{D}(p(y | x, w), p(y | x, \tilde{w})) p(\tilde{w} | \mathcal{D}), \tag{30}$$

where  $D(\cdot, \cdot)$  is a distance or divergence of distributions which is computed using the parameters that determine those distributions. The distance/divergence  $D(\cdot, \cdot)$  eliminates the aleatoric uncertainty, which is present in  $p(\mathbf{y} \mid \mathbf{x}, \mathbf{w})$  and  $p(\mathbf{y} \mid \mathbf{x}, \tilde{\mathbf{w}})$ . Essentially,  $D(\cdot, \cdot)$  reduces distributions to functions of their parameters.

Importance sampling is applied to estimate integrals of the form

$$s = \int_{\mathcal{X}} f(\mathbf{x}) p(\mathbf{x}) d\mathbf{x} = \int_{\mathcal{X}} \frac{f(\mathbf{x}) p(\mathbf{x})}{q(\mathbf{x})} q(\mathbf{x}) d\mathbf{x}, \quad (31)$$

with integrand  $f(\mathbf{x})$  and probability distributions  $p(\mathbf{x})$  and  $q(\mathbf{x})$ , when it is easier to sample according to  $q(\mathbf{x})$  than  $p(\mathbf{x})$ . The estimator of Eq. (31) when drawing  $\mathbf{x}_n$  according to  $q(\mathbf{x})$  is given by

$$\hat{s} = \frac{1}{N} \sum_{n=1}^N \frac{f(\mathbf{x}_n) p(\mathbf{x}_n)}{q(\mathbf{x}_n)}. \quad (32)$$

The asymptotic variance  $\sigma_s^2$  of importance sampling is given by (see e.g. [Owen and Zhou \[2000\]](#)):

$$\begin{aligned} \sigma_s^2 &= \int_{\mathcal{X}} \left( \frac{f(\mathbf{x}) p(\mathbf{x})}{q(\mathbf{x})} - s \right)^2 q(\mathbf{x}) d\mathbf{x} \\ &= \int_{\mathcal{X}} \left( \frac{f(\mathbf{x}) p(\mathbf{x})}{q(\mathbf{x})} \right)^2 q(\mathbf{x}) d\mathbf{x} - s^2, \end{aligned} \quad (33)$$

and its estimator when drawing  $\mathbf{x}_n$  from  $q(\mathbf{x})$  is given by

$$\begin{aligned} \hat{\sigma}_s^2 &= \frac{1}{N} \sum_{n=1}^N \left( \frac{f(\mathbf{x}_n) p(\mathbf{x}_n)}{q(\mathbf{x}_n)} - s \right)^2 \\ &= \frac{1}{N} \sum_{n=1}^N \left( \frac{f(\mathbf{x}_n) p(\mathbf{x}_n)}{q(\mathbf{x}_n)} \right)^2 - s^2. \end{aligned} \quad (34)$$

We observe, that the variance is determined by the term  $\frac{f(\mathbf{x})p(\mathbf{x})}{q(\mathbf{x})}$ , thus we want  $q(\mathbf{x})$  to be proportional to  $f(\mathbf{x})p(\mathbf{x})$ . Most importantly,  $q(\mathbf{x})$  should not be close to zero for large  $f(\mathbf{x})p(\mathbf{x})$ . To give an intuition about the severity of unmatched modes, we depict an educational example in Fig. B.1. Now we plug in the form of the integrand given by Eq. (30) into Eq. (31), to calculate the expected divergence  $D(\cdot, \cdot)$  under the model posterior  $p(\tilde{\mathbf{w}} \mid \mathcal{D})$ . This results in

$$v = \int_{\mathcal{W}} \frac{D(p(\mathbf{y} \mid \mathbf{x}, \mathbf{w}), p(\mathbf{y} \mid \mathbf{x}, \tilde{\mathbf{w}})) p(\tilde{\mathbf{w}} \mid \mathcal{D})}{q(\tilde{\mathbf{w}})} q(\tilde{\mathbf{w}}) d\tilde{\mathbf{w}}, \quad (35)$$

with estimate

$$\hat{v} = \frac{1}{N} \sum_{n=1}^N \frac{D(p(\mathbf{y} \mid \mathbf{x}, \mathbf{w}), p(\mathbf{y} \mid \mathbf{x}, \tilde{\mathbf{w}}_n)) p(\tilde{\mathbf{w}}_n \mid \mathcal{D})}{q(\tilde{\mathbf{w}}_n)}. \quad (36)$$

The variance is given by

$$\begin{aligned} \sigma_v^2 &= \int_{\mathcal{W}} \left( \frac{D(p(\mathbf{y} \mid \mathbf{x}, \mathbf{w}), p(\mathbf{y} \mid \mathbf{x}, \tilde{\mathbf{w}})) p(\tilde{\mathbf{w}} \mid \mathcal{D})}{q(\tilde{\mathbf{w}})} - v \right)^2 q(\tilde{\mathbf{w}}) d\tilde{\mathbf{w}} \\ &= \int_{\mathcal{W}} \left( \frac{D(p(\mathbf{y} \mid \mathbf{x}, \mathbf{w}), p(\mathbf{y} \mid \mathbf{x}, \tilde{\mathbf{w}})) p(\tilde{\mathbf{w}} \mid \mathcal{D})}{q(\tilde{\mathbf{w}})} \right)^2 q(\tilde{\mathbf{w}}) d\tilde{\mathbf{w}} - v^2. \end{aligned} \quad (37)$$

The estimate for the variance is given by

$$\begin{aligned} \hat{\sigma}_v^2 &= \frac{1}{N} \sum_{n=1}^N \left( \frac{D(p(\mathbf{y} \mid \mathbf{x}, \mathbf{w}), p(\mathbf{y} \mid \mathbf{x}, \tilde{\mathbf{w}}_n)) p(\tilde{\mathbf{w}}_n \mid \mathcal{D})}{q(\tilde{\mathbf{w}}_n)} - v \right)^2 \\ &= \frac{1}{N} \sum_{n=1}^N \left( \frac{D(p(\mathbf{y} \mid \mathbf{x}, \mathbf{w}), p(\mathbf{y} \mid \mathbf{x}, \tilde{\mathbf{w}}_n)) p(\tilde{\mathbf{w}}_n \mid \mathcal{D})}{q(\tilde{\mathbf{w}}_n)} \right)^2 - v^2, \end{aligned} \quad (38)$$

where  $\tilde{\mathbf{w}}_n$  is drawn according to  $q(\tilde{\mathbf{w}})$ . The asymptotic ( $N \rightarrow \infty$ ) confidence intervals are given by

$$\lim_{N \rightarrow \infty} \Pr \left( -a \frac{\sigma_v}{\sqrt{N}} \leq \hat{v} - v \leq b \frac{\sigma_v}{\sqrt{N}} \right) = \frac{1}{\sqrt{2} \pi} \int_{-a}^b \exp(-1/2 t^2) dt. \quad (39)$$

Thus,  $\hat{v}$  converges with  $\frac{\sigma_v}{\sqrt{N}}$  to  $v$ . The asymptotic confidence interval is proofed in Weinzierl [2000] and Hesterberg [1996] using the Lindeberg–Lévy central limit theorem which ensures the asymptotic normality of the estimate  $\hat{v}$ . The  $q(\tilde{\mathbf{w}})$  that minimizes the variance is

$$q(\tilde{\mathbf{w}}) = \frac{D(p(\mathbf{y} | \mathbf{x}, \mathbf{w}), p(\mathbf{y} | \mathbf{x}, \tilde{\mathbf{w}})) p(\tilde{\mathbf{w}} | \mathcal{D})}{v}. \quad (40)$$

Thus we want to find a density  $q(\tilde{\mathbf{w}})$  that is proportional to  $D(p(\mathbf{y} | \mathbf{x}, \mathbf{w}), p(\mathbf{y} | \mathbf{x}, \tilde{\mathbf{w}})) p(\tilde{\mathbf{w}} | \mathcal{D})$ . Only approximating the posterior  $p(\tilde{\mathbf{w}} | \mathcal{D})$  as Deep Ensembles or MC dropout is insufficient to guarantee a low expected error, since the sampling variance cannot be bounded, as  $\sigma_v^2$  could get arbitrarily big if the distance is large but the probability under the sampling distribution is very small. For  $q(\tilde{\mathbf{w}}) \propto p(\tilde{\mathbf{w}} | \mathcal{D})$  and non-negative, unbounded, but continuous  $D(\cdot, \cdot)$ , the variance  $\sigma_v^2$  given by Eq. (37) cannot be bounded.

For example, if  $D(\cdot, \cdot)$  is the KL-divergence and both  $p(\mathbf{y} | \mathbf{x}, \mathbf{w})$  and  $p(\mathbf{y} | \mathbf{x}, \tilde{\mathbf{w}})$  are Gaussians where the means  $\mu(\mathbf{x}, \mathbf{w})$ ,  $\mu(\mathbf{x}, \tilde{\mathbf{w}})$  and variances  $\sigma^2(\mathbf{x}, \mathbf{w})$ ,  $\sigma^2(\mathbf{x}, \tilde{\mathbf{w}})$  are estimates provided by the models, the KL is unbounded. The KL divergence between two Gaussian distributions is given by

$$\begin{aligned} D_{\text{KL}}(p(y | \mathbf{x}, \mathbf{w}) \| p(y | \mathbf{x}, \tilde{\mathbf{w}})) &= - \int_{\mathcal{Y}} p(y | \mathbf{x}, \mathbf{w}) \log \left( \frac{p(y | \mathbf{x}, \mathbf{w})}{p(y | \mathbf{x}, \tilde{\mathbf{w}})} \right) dy \\ &= \frac{1}{2} \log \left( \frac{\sigma^2(\mathbf{x}, \tilde{\mathbf{w}})}{\sigma^2(\mathbf{x}, \mathbf{w})} \right) + \frac{\sigma^2(\mathbf{x}, \mathbf{w}) + (\mu(\mathbf{x}, \mathbf{w}) - \mu(\mathbf{x}, \tilde{\mathbf{w}}))^2}{2 \sigma^2(\mathbf{x}, \tilde{\mathbf{w}})} - \frac{1}{2}. \end{aligned} \quad (41)$$

For  $\sigma^2(\mathbf{x}, \tilde{\mathbf{w}})$  going towards zero and a non-zero difference of the mean values, the KL-divergence can be arbitrarily large. Therefore, methods that only consider the posterior  $p(\tilde{\mathbf{w}} | \mathcal{D})$  cannot bound the variance  $\sigma_v^2$  if  $D(\cdot, \cdot)$  is unbounded and the parameters  $\tilde{\mathbf{w}}$  allow distributions which can make  $D(\cdot, \cdot)$  arbitrary large.

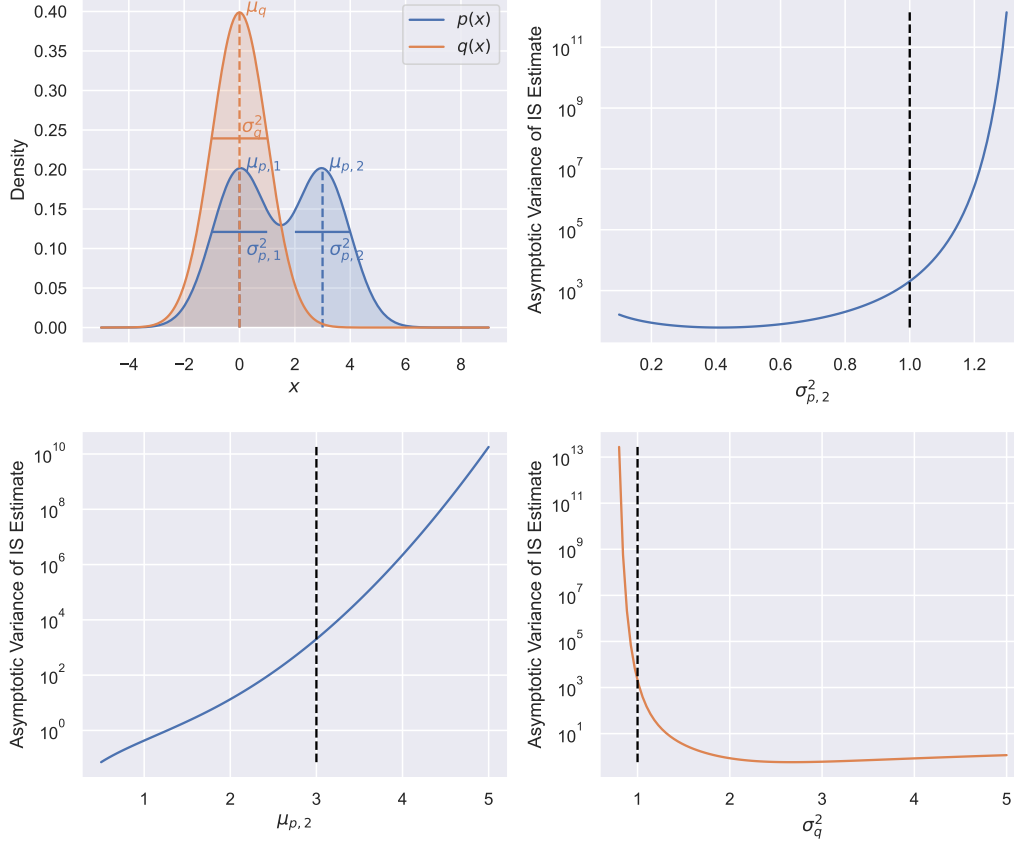

Figure B.1: Analysis of asymptotic variance of importance sampling for multimodal target distribution  $p(x)$  and a unimodal sampling distribution  $q(x)$ . The target distribution is a mixture of two Gaussian distributions with means  $\mu_{p,1}, \mu_{p,2}$  and variances  $\sigma_{p,1}^2, \sigma_{p,2}^2$ . The sampling distribution is a single Gaussian with mean  $\mu_q$  and variance  $\sigma_q^2$ .  $q(x)$  matches one of the modes of  $p(x)$ , but misses the other. Both distributions are visualized for their standard parameters  $\mu_{p,1} = \mu_q = 0, \mu_{p,2} = 3$  and  $\sigma_{p,1}^2 = \sigma_{p,2}^2 = \sigma_q^2 = 1$ , where both mixture components of  $p(x)$  are equally weighted. We calculate the asymptotic variance (Eq. (33) with  $f(x) = 1$ ) for different values of  $\sigma_{p,2}^2, \mu_{p,2}$  and  $\sigma_q^2$  and show the results in the top right, bottom left and bottom right plot respectively. The standard value for the varied parameter is indicated by the black dashed line. We observe, that slightly increasing the variance of the second mixture component of  $p(x)$ , which is not matched by the mode of  $q(x)$ , rapidly increases the asymptotic variance. Similarly, increasing the distance between the center of the unmatched mixture component of  $p(x)$  and  $q(x)$  strongly increases the asymptotic variance. On the contrary, increasing the variance of the sampling distribution  $q(x)$  does not lead to a strong increase, as the worse approximation of the matched mode of  $p(x)$  is counterbalanced by putting probability mass where the second mode of  $p(x)$  is located. Note, that this issue is even more exacerbated if  $f(x)$  is non-constant. Then,  $q(x)$  has to match the modes of  $f(x)$  as well.

## C Experimental Details and Further Experiments

Our code is publicly available at <https://github.com/ml-jku/quam>.

### C.1 Details on the Adversarial Model Search

During the adversarial model search, we seek to maximize the KL divergence between the prediction of the reference model and adversarial models. For an example, see Fig. C.1. We found that directly maximizing the KL divergence always leads to similar solutions to the optimization problem. Therefore, we maximized the likelihood of a new test point to be in each possible class. The optimization problem is very similar, considering the predictive distribution  $p(\mathbf{y} \mid \mathbf{x}, \mathbf{w})$  of a reference model and the predictive distribution  $p(\mathbf{y} \mid \mathbf{x}, \tilde{\mathbf{w}})$  of an adversarial model, the model that is updated. The KL divergence between those two is given by

$$\begin{aligned} D_{\text{KL}}(p(\mathbf{y} \mid \mathbf{x}, \mathbf{w}) \parallel p(\mathbf{y} \mid \mathbf{x}, \tilde{\mathbf{w}})) \\ &= \sum p(\mathbf{y} \mid \mathbf{x}, \mathbf{w}) \log \left( \frac{p(\mathbf{y} \mid \mathbf{x}, \mathbf{w})}{p(\mathbf{y} \mid \mathbf{x}, \tilde{\mathbf{w}})} \right) \\ &= \sum p(\mathbf{y} \mid \mathbf{x}, \mathbf{w}) \log(p(\mathbf{y} \mid \mathbf{x}, \mathbf{w})) - \sum p(\mathbf{y} \mid \mathbf{x}, \mathbf{w}) \log(p(\mathbf{y} \mid \mathbf{x}, \tilde{\mathbf{w}})) \\ &= -H[p(\mathbf{y} \mid \mathbf{x}, \mathbf{w})] + \text{CE}[p(\mathbf{y} \mid \mathbf{x}, \mathbf{w}), p(\mathbf{y} \mid \mathbf{x}, \tilde{\mathbf{w}})]. \end{aligned} \quad (42)$$

Only the cross-entropy between the predictive distributions of the reference model parameterized by  $\mathbf{w}$  and the adversarial model parameterized by  $\tilde{\mathbf{w}}$  plays a role in the optimization, since the entropy of  $p_{\mathbf{w}}$  stays constant during the adversarial model search. Thus, the optimization target is equivalent to the cross-entropy loss, except that  $p_{\mathbf{w}}$  is generally not one-hot encoded but an arbitrary categorical distribution. This also relates to targeted / untargeted adversarial attacks on the input. Targeted attacks try to maximize the output probability of a specific class. Untargeted attacks try to minimize the probability of the originally predicted class, by maximizing all other classes. We found that attacking individual classes works better empirically, while directly maximizing the KL divergence always leads to similar solutions for different searches. The result often is a further increase of the probability associated with the most likely class. Therefore, we conducted as many adversarial model searches for a new test point, as there are classes in the classification task. Thereby, we optimize the cross-entropy loss for one specific class in each search.

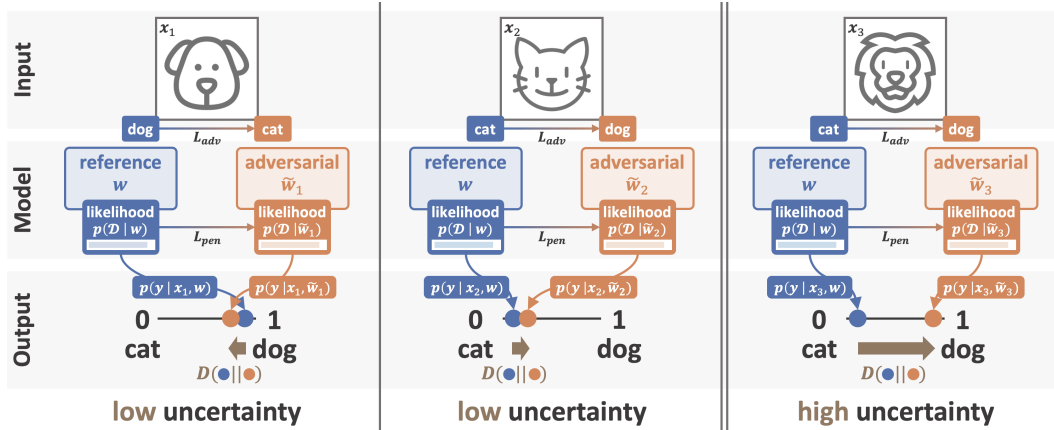

Figure C.1: Illustrative example of QUAM. We illustrate quantifying the predictive uncertainty of a given, pre-selected model (blue), a classifier for images of cats and dogs. For each of the input images, we search for adversarial models (orange) that make different predictions than the given, pre-selected model while explaining the training data equally well (having a high likelihood). The adversarial models found for an image of a dog or a cat still make similar predictions (low epistemic uncertainty), while the adversarial model found for an image of a lion makes a highly different prediction (high epistemic uncertainty), as features present in images of both cats and dogs can be utilized to classify the image of a lion.

For regression, we add a small perturbation to the bias of the output linear layer. This is necessary to ensure a gradient in the first update step, as the model to optimize is initialized with the reference model. For regression, we perform the adversarial model search two times, as the output of an adversarial model could be higher or lower than the reference model if we assume a scalar output. We force, that the two adversarial model searches get higher or lower outputs than the reference model respectively. While the loss of the reference model on the training dataset  $L_{\text{ref}}$  is calculated on the full training dataset (as it has to be done only once), we approximate  $L_{\text{pen}}$  by randomly drawn mini-batches for each update step. Therefore, the boundary condition might not be satisfied on the full training set, even if the boundary condition is satisfied for the mini-batch estimate.

As described in the main paper, the resulting model of each adversarial model search is used to define the location of a mixture component of a sampling distribution  $q(\tilde{w})$  (Eq. (6)). The epistemic uncertainty is estimated by Eq. (4), using models sampled from this mixture distribution. The simplest choice of distributions for each mixture distribution is a delta distribution at the location of the adversarial model  $\tilde{w}_k$ . While this performs well empirically, we discard a lot of information by not utilizing predictions of models obtained throughout the adversarial model search. The intermediate solutions of the adversarial model search allow to assess how easily models with highly divergent predictive distributions to the reference model can be found. Furthermore, the expected mean squared error (Eq. (5)) decreases with  $\frac{1}{N}$  with the number of samples  $N$  and the expected variance of the estimator (Eq. (38)) decreases with  $\frac{1}{\sqrt{N}}$ . Therefore, using more samples is beneficial empirically, even though we potentially introduce a bias to the estimator.

Consequently, we utilize all sampled models during the adversarial model search as an empirical sampling distribution for our experiments. This is the same as how members of an ensemble can be seen as an empirical sampling distribution [Gustafsson et al., 2020] and conceptually similar to Snapshot ensembling [Huang et al., 2017]. To compute Eq. (4), we use the negative exponential training loss of each model to approximate its posterior probability  $p(\tilde{w} \mid \mathcal{D})$ . Note that the training loss is the negative log-likelihood, which in turn is proportional to the posterior probability. Note we temperature-scale the approximate posterior probability by  $p(\tilde{w} \mid \mathcal{D})^{\frac{1}{T}}$ , with the temperature parameter  $T$  set as a hyperparameter.

## C.2 Simplex Example

We sample the training dataset  $\mathcal{D} = \{(\mathbf{x}_k, \mathbf{y}_k)\}_{k=1}^K$  from three Gaussian distributions (21 datapoints from each Gaussian) at locations  $\mu_1 = (-4, -2)^T$ ,  $\mu_2 = (4, -2)^T$ ,  $\mu_3 = (0, 2\sqrt{2})^T$  and the same two-dimensional covariance with  $\sigma^2 = 1.5$  on both entries of the diagonal and zero on the off-diagonals. The labels  $\mathbf{y}_k$  are one-hot encoded vectors, signifying which Gaussian the input  $\mathbf{x}_k$  was sampled from. The new test point  $\mathbf{x}$  we evaluate for is located at  $(-6, 2)$ . To attain the likelihood

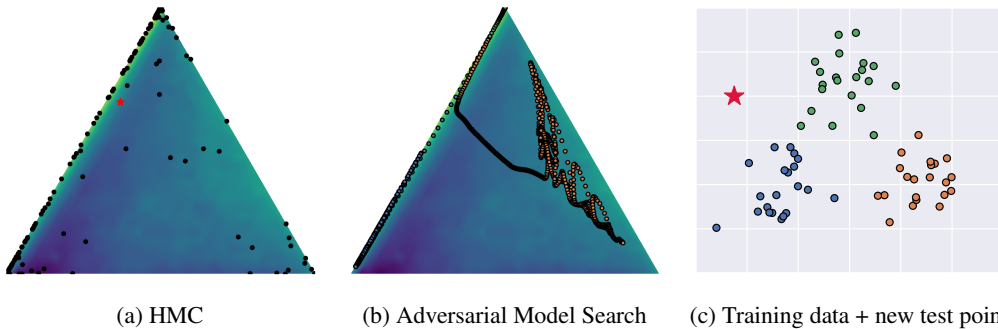

Figure C.2: Softmax outputs (black) of individual models of HMC (a) as well as their average output (red) on a probability simplex. Softmax outputs of models found throughout the adversarial model search (b), colored by the attacked class. Left, right and top corners denote 100% probability mass at the blue, orange and green class in (c) respectively. Models were selected on the training data, and evaluated on the new test point (red) depicted in (c). The background color denotes the maximum likelihood of the training data that is achievable by a model having equal softmax output as the respective location on the simplex.

for each position on the probability simplex, we train a two-layer fully connected neural network (with parameters  $\mathbf{w}$ ) with hidden size of 10 on this dataset. We minimize the combined loss

$$L = \frac{1}{K} \sum_{k=1}^K l(p(\mathbf{y} | \mathbf{x}_k, \mathbf{w}), \mathbf{y}_k) + l(p(\mathbf{y} | \mathbf{x}, \mathbf{w}), \check{\mathbf{y}}), \quad (43)$$

where  $l$  is the cross-entropy loss function and  $\check{\mathbf{y}}$  is the desired categorical distribution for the output of the network. We report the likelihood on the training dataset upon convergence of the training procedure for  $\check{\mathbf{y}}$  on the probability simplex. To average over different initializations of  $\mathbf{w}$  and alleviate the influence of potentially bad local minima, we use the median over 20 independent runs to calculate the maximum.

For all methods, we utilize the same two-layer fully connected neural network with hidden size of 10; for MC dropout we additionally added dropout with dropout probability 0.2 after every intermediate layer. We trained 50 networks for the Deep Ensemble results. For MC dropout we sampled predictive distributions using 1000 forward passes.

Fig. C.2 (a) shows models sampled using HMC, which is widely regarded as the best approximation to the ground truth for predictive uncertainty estimation. Furthermore, Fig. C.2 (b) shows models obtained by executing the adversarial model search for the given training dataset and test point depicted in Fig. C.2 (c). HMC also provides models that put more probability mass on the orange class. Those are missed by Deep Ensembles and MC dropout (see Fig. 2 (a) and (b)). The adversarial model search used by QUAM helps to identify those regions.

### C.3 Epistemic Uncertainty on Synthetic Dataset

We create the two-moons dataset using the implementation of [Pedregosa et al. \[2011\]](#). All experiments were performed on a three-layer fully connected neural network with hidden size 100 and ReLU activations. For MC dropout, dropout with dropout probability of 0.2 was applied after the intermediate layers. We assume to have a trained reference model  $\mathbf{w}$  of this architecture. Results of the same runs as in the main paper, but calculated for the epistemic uncertainty in setting (b) (see Eq. (2)) are depicted in Fig. C.3. Again, QUAM matches the ground truth best.

Furthermore, we conducted experiments on a synthetic regression dataset, where the input feature  $x$  is drawn randomly between  $[-\pi, \pi]$  and the target is  $y = \sin(x) + \epsilon$ , with  $\epsilon \sim \mathcal{N}(0, 0.1)$ . The results are depicted in Fig. C.4. As for the classification results, the estimate of QUAM is closest to the ground truth provided by HMC.

The HMC implementation of [Cobb and Jalaian \[2021\]](#) was used to obtain the ground truth epistemic uncertainties. For the Laplace approximation, we used the implementation of [Daxberger et al. \[2021\]](#). For SG-MCMC we used the python package of [Kapoor \[2023\]](#).

### C.4 Epistemic Uncertainty on Vision Datasets

Several vision datasets and their corresponding OOD datasets are commonly used for benchmarking predictive uncertainty quantification in the literature, e.g. in [Blundell et al. \[2015\]](#), [Gal and Ghahramani \[2016\]](#), [Malinin and Gales \[2018\]](#), [Ovadia et al. \[2019\]](#), [van Amersfoort et al. \[2020\]](#), [Mukhoti et al. \[2021\]](#), [Postels et al. \[2021\]](#), [Band et al. \[2022\]](#). Our experiments focused on two of those: MNIST [[LeCun et al., 1998](#)] and its OOD derivatives as the most basic benchmark and ImageNet1K [[Deng et al., 2009](#)] to demonstrate our method’s ability to perform on a larger scale. Four types of experiments were performed: (i) OOD detection (ii) adversarial example detection, (iii) misclassification detection and (iv) selective prediction. Our experiments on adversarial example detection did not utilize a specific adversarial attack on the input images, but natural adversarial examples [[Hendrycks et al., 2021](#)], which are images from the ID classes, but wrongly classified by standard ImageNet classifiers. Misclassification detection and selective prediction was only performed for ImageNet1K, since MNIST classifiers easily reach accuracies of 99% on the test set, thus hardly misclassifying any samples. In all cases except selective prediction, we measured AUROC, FPR at TPR of 95% and AUPR of classifying ID vs. OOD, non-adversarial vs. adversarial and correctly classified vs. misclassified samples (on ID test set), using the epistemic uncertainty estimate provided by the different methods. For selective prediction, we utilized the epistemic uncertainty estimate to select a subset of samples on the ID test set.

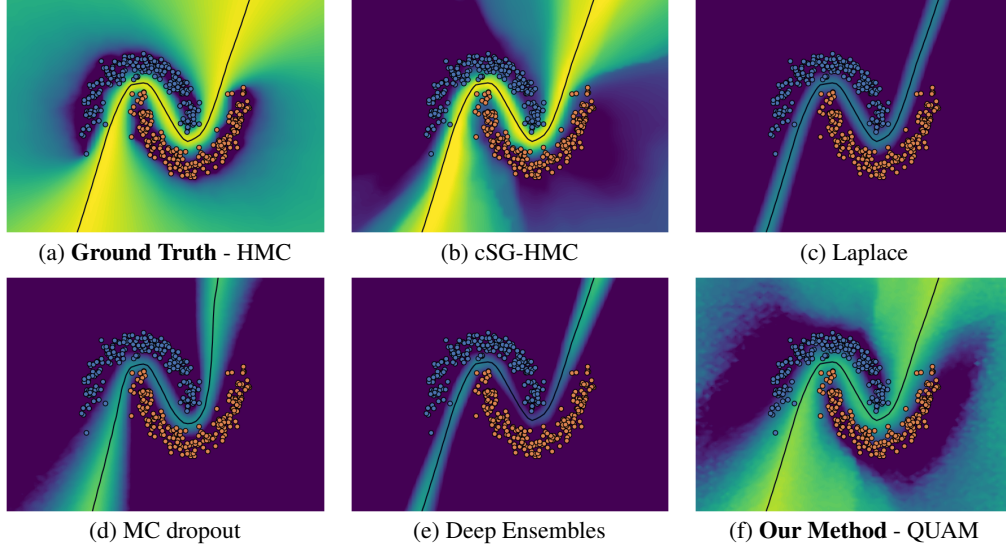

Figure C.3: Epistemic uncertainty as in Eq. (2). Yellow denotes high epistemic uncertainty. Purple denotes low epistemic uncertainty. The black lines show the decision boundary of the reference model  $w$ . HMC is considered to be the ground truth epistemic uncertainty. The estimate of QUAM is closest to the ground truth. All other methods underestimate the epistemic uncertainty in the top left and bottom right corner, as all models sampled by those predict the same class with high confidence for those regions.

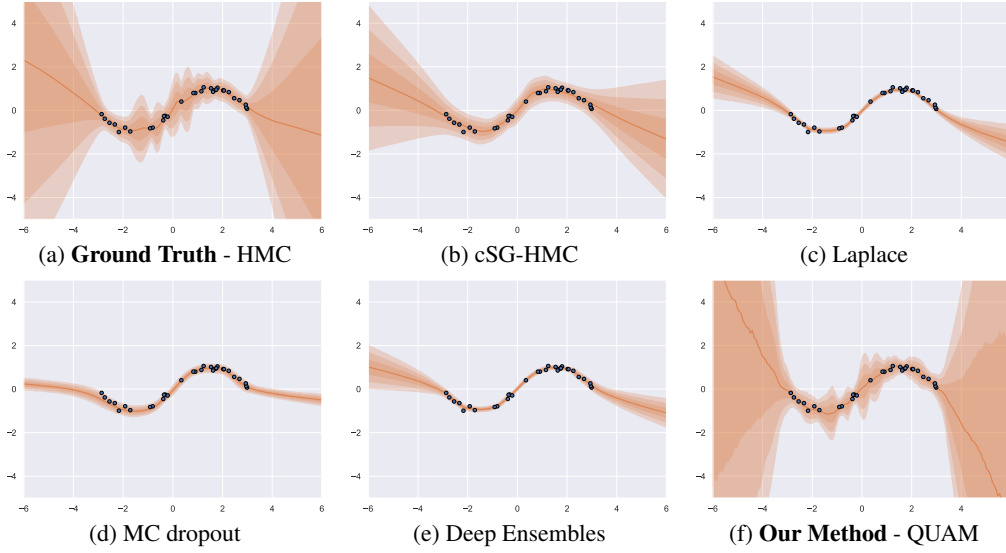

Figure C.4: Variance between different models found by different methods on synthetic sine dataset. Orange line denotes the empirical mean of the averaged models, shades denote one, two and three standard deviations respectively. HMC is considered to be the ground truth epistemic uncertainty. The estimate of QUAM is closest to the ground truth. All other methods fail to capture the variance between points as well as the variance left outside the region  $([-\pi, \pi])$  datapoints are sampled from.

Table C.1: Additional baseline MoLA: AUROC using the epistemic uncertainty of a given, pre-selected model as a score to distinguish between ID (MNIST) and OOD samples. Results for additional baseline method MoLA, comparing to Laplace approximation, Deep Ensembles (DE) and QUAM. Results are averaged over three independent runs.

| $\mathcal{D}_{\text{ood}}$ | Laplace         | MoLA            | DE              | QUAM                   |
|----------------------------|-----------------|-----------------|-----------------|------------------------|
| FMNIST                     | .978 $\pm$ .004 | .986 $\pm$ .002 | .988 $\pm$ .001 | <b>.994</b> $\pm$ .001 |
| KMNIST                     | .959 $\pm$ .006 | .984 $\pm$ .000 | .990 $\pm$ .001 | <b>.994</b> $\pm$ .001 |
| EMNIST                     | .877 $\pm$ .011 | .920 $\pm$ .002 | .924 $\pm$ .003 | <b>.937</b> $\pm$ .008 |
| OMNIGLOT                   | .963 $\pm$ .003 | .979 $\pm$ .000 | .983 $\pm$ .001 | <b>.992</b> $\pm$ .001 |

#### C.4.1 MNIST

OOD detection experiments were performed on MNIST with FashionMNIST (FMNIST) [Xiao et al., 2017], EMNIST [Cohen et al., 2017], KMNIST [Clanuwat et al., 2018] and OMNIGLOT [Lake et al., 2015] as OOD datasets. In case of EMNIST, we only used the "letters" subset, thus excluding classes overlapping with MNIST (digits). We used the MNIST (test set) vs FMNIST (train set) OOD detection task to tune hyperparameters for all methods. The evaluation was performed using the complete test sets of the above-mentioned datasets ( $n = 10000$ ).

For each seed, a separate set of Deep Ensembles was trained. Ensembles with the size of 10 were found to perform best. MC dropout was used with a number of samples set to 2048. This hyperparameter setting was found to perform well. A higher sampling size would increase the performance marginally while increasing the computational load. Noteworthy is the fact, that with these settings the computational requirements of MC dropout surpassed those of QUAM. Laplace approximation was performed only for the last layer, due to the computational demand making it infeasible on the full network with our computational capacities. Mixture of Laplace approximations [Eschenhagen et al. [2021]] was evaluated as well using the parameters provided in the original work. Notably, the results from the original work suggesting improved performance compared to the Deep Ensembles on these tasks could not be reproduced. Comparison is provided in Table C.1. SG-HMC was performed on the full network using the Python package from Kapoor [2023]. Parameters were set in accordance with those of the original authors [Zhang et al., 2020]. For QUAM, the initial penalty parameter found by tuning was  $c_0 = 6$ , which was exponentially increased ( $c_{t+1} = \eta c_t$ ) with  $\eta = 2$  every 14 gradient steps for a total of two epochs through the training dataset. Gradient steps were performed using Adam [Kingma and Ba, 2014] with a learning rate of  $5.e-3$  and weight decay of  $1.e-3$ , chosen equivalent to the original training parameters of the model. A temperature of  $1.e-3$  was used for scaling the cross-entropy loss, an approximation for the posterior probabilities when calculating Eq. (4). Detailed results and additional metrics and replicates of the experiments can be found in Tab. C.2. Experiments were performed three times with seeds: {42, 142, 242} to provide confidence intervals. Histograms of the scores on the ID dataset and the OOD datasets for different methods are depicted in Fig. C.5.

#### C.4.2 ImageNet

For ImageNet1K [Deng et al., 2009], OOD detection experiments were performed with ImageNet-O [Hendrycks et al., 2021], adversarial example detection experiments with ImageNet-A [Hendrycks et al., 2021], and misclassification detection as well as selective prediction experiments on the official validation set of ImageNet1K. For each experiment, we utilized a pre-trained EfficientNet [Tan and Le, 2019] architecture with 21.5 million trainable weights available through PyTorch [Paszke et al., 2019], achieving a top-1 accuracy of 84.2% as well as a top-5 accuracy of 96.9%.

cSG-HMC was performed on the last layer using the best hyperparameters that resulted from a hyperparameter search around the ones suggested by the original authors [Zhang et al., 2020]. The Laplace approximation with the implementation of [Daxberger et al., 2021] was not feasible to compute for this problem on our hardware, even only for the last layer. Similarly to the experiments in section C.4.1, we compare against a Deep Ensemble consisting of 10 pre-trained EfficientNet architectures ranging from 5.3 million to 66.3 million trainable weights (DE (all)). Also, we retrained the last layer of 10 ensemble members (DE (LL)) given the same base network. We also compare

Table C.2: Detailed results of MNIST OOD detection experiments, reporting AUROC, AUPR and FPR@TPR=95% for individual seeds.

| OOD dataset    | Method         | Seed   | ↑ AUPR | ↑ AUROC | ↓ FPR@TPR=95% |        |
|----------------|----------------|--------|--------|---------|---------------|--------|
| EMNIST         | cSG-HMC        | 42     | 0.8859 | 0.8823  | 0.5449        |        |
|                |                | 142    | 0.8714 | 0.8568  | 0.8543        |        |
|                |                | 242    | 0.8797 | 0.8673  | 0.7293        |        |
|                | Laplace        | 42     | 0.8901 | 0.8861  | 0.5273        |        |
|                |                | 142    | 0.8762 | 0.8642  | 0.7062        |        |
|                |                | 242    | 0.8903 | 0.8794  | 0.6812        |        |
|                | Deep Ensembles | 42     | 0.9344 | 0.9239  | 0.4604        |        |
|                |                | 142    | 0.9325 | 0.9236  | 0.4581        |        |
|                |                | 242    | 0.9354 | 0.9267  | 0.4239        |        |
|                | MC dropout     | 42     | 0.8854 | 0.8787  | 0.5636        |        |
|                |                | 142    | 0.8769 | 0.8630  | 0.6718        |        |
|                |                | 242    | 0.8881 | 0.8751  | 0.6855        |        |
| FMNIST         | QUAM           | 42     | 0.9519 | 0.9454  | 0.3405        |        |
|                |                | 142    | 0.9449 | 0.9327  | 0.4538        |        |
|                |                | 242    | 0.9437 | 0.9317  | 0.4325        |        |
|                | cSG-HMC        | 42     | 0.9532 | 0.9759  | 0.0654        |        |
|                |                | 142    | 0.9610 | 0.9731  | 0.0893        |        |
|                |                | 242    | 0.9635 | 0.9827  | 0.0463        |        |
|                | Laplace        | 42     | 0.9524 | 0.9754  | 0.0679        |        |
|                |                | 142    | 0.9565 | 0.9739  | 0.0788        |        |
|                |                | 242    | 0.9613 | 0.9824  | 0.0410        |        |
|                | Deep Ensembles | 42     | 0.9846 | 0.9894  | 0.0319        |        |
|                |                | 142    | 0.9776 | 0.9865  | 0.0325        |        |
|                |                | 242    | 0.9815 | 0.9881  | 0.0338        |        |
|                | MC dropout     | 42     | 0.9595 | 0.9776  | 0.0644        |        |
| KMNIST         |                | 142    | 0.9641 | 0.9748  | 0.0809        |        |
|                |                | 242    | 0.9696 | 0.9848  | 0.0393        |        |
| QUAM           | 42             | 0.9896 | 0.9932 | 0.0188  |               |        |
|                | 142            | 0.9909 | 0.9937 | 0.0210  |               |        |
|                | 242            | 0.9925 | 0.9952 | 0.0132  |               |        |
| cSG-HMC        | 42             | 0.9412 | 0.9501 | 0.2092  |               |        |
|                | 142            | 0.9489 | 0.9591 | 0.1551  |               |        |
|                | 242            | 0.9505 | 0.9613 | 0.1390  |               |        |
| Laplace        | 42             | 0.9420 | 0.9520 | 0.1915  |               |        |
|                | 142            | 0.9485 | 0.9617 | 0.1378  |               |        |
|                | 242            | 0.9526 | 0.9640 | 0.1165  |               |        |
| Deep Ensembles | 42             | 0.9885 | 0.9899 | 0.0417  |               |        |
|                | 142            | 0.9875 | 0.9891 | 0.0458  |               |        |
|                | 242            | 0.9884 | 0.9896 | 0.0473  |               |        |
| MC dropout     | 42             | 0.9424 | 0.9506 | 0.2109  |               |        |
|                | OMNIGLOT       |        | 142    | 0.9531  | 0.9618        | 0.1494 |
|                |                |        | 242    | 0.9565  | 0.9651        | 0.1293 |
| QUAM           | 42             | 0.9928 | 0.9932 | 0.0250  |               |        |
|                | 142            | 0.9945 | 0.9952 | 0.0194  |               |        |
|                | 242            | 0.9925 | 0.9932 | 0.0260  |               |        |
| cSG-HMC        | 42             | 0.9499 | 0.9658 | 0.1242  |               |        |
|                | 142            | 0.9459 | 0.9591 | 0.1498  |               |        |
|                | 242            | 0.9511 | 0.9637 | 0.1222  |               |        |
| Laplace        | 42             | 0.9485 | 0.9647 | 0.1238  |               |        |
|                | 142            | 0.9451 | 0.9597 | 0.1345  |               |        |
|                | 242            | 0.9526 | 0.9656 | 0.1077  |               |        |
| Deep Ensembles | 42             | 0.9771 | 0.9822 | 0.0621  |               |        |
|                | 142            | 0.9765 | 0.9821 | 0.0659  |               |        |
|                | 242            | 0.9797 | 0.9840 | 0.0581  |               |        |
| MC dropout     | 42             | 0.9534 | 0.9663 | 0.1248  |               |        |
|                |                |        | 142    | 0.9520  | 0.9619        | 0.1322 |
|                |                |        | 242    | 0.9574  | 0.9677        | 0.1063 |
|                | QUAM           | 42     | 0.9920 | 0.9930  | 0.0274        |        |
|                |                | 142    | 0.9900 | 0.9909  | 0.0348        |        |
|                |                | 242    | 0.9906 | 0.9915  | 0.0306        |        |

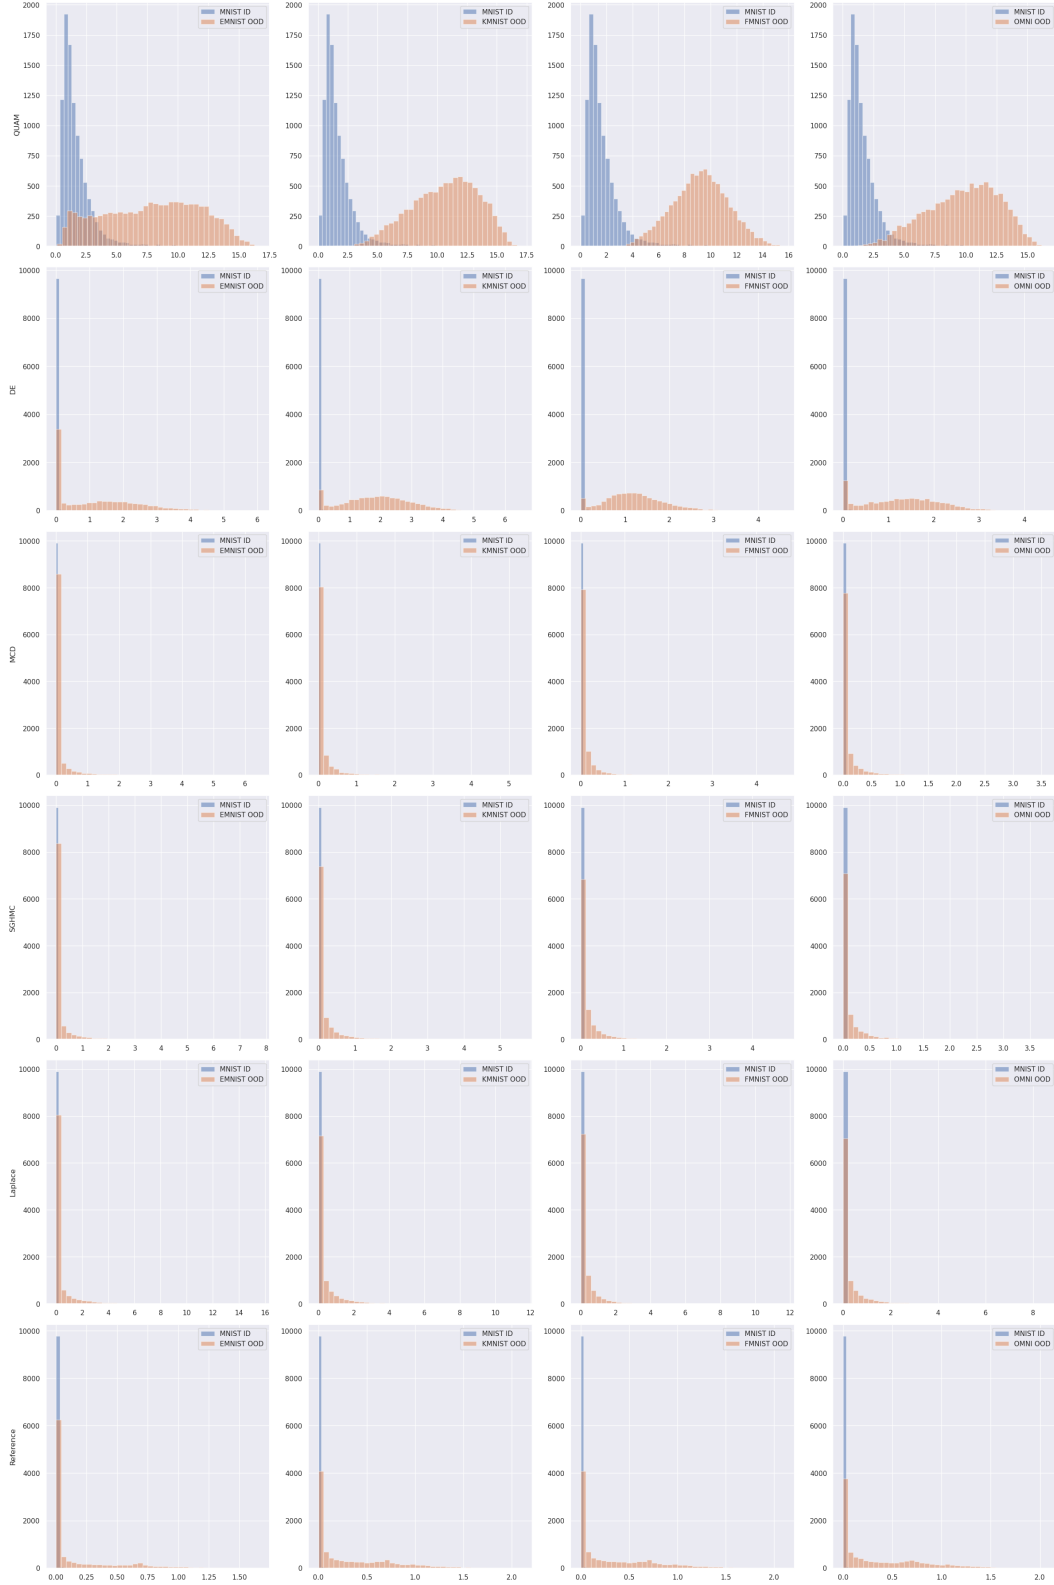

Figure C.5: MNIST: Histograms of uncertainty scores calculated for test set samples of the specified datasets.

Table C.3: Calibration: expected calibration error (ECE) based on the weighted average predictive distribution. Reference refers to the predictive distribution of the given, pre-selected model. Experiment was performed on three distinct splits, each containing 7000 ImageNet-1K validation samples.

| Reference       | cSG-HMC         | MCD             | DE              | QUAM            |
|-----------------|-----------------|-----------------|-----------------|-----------------|
| $.159 \pm .004$ | $.364 \pm .001$ | $.166 \pm .004$ | $.194 \pm .004$ | $.096 \pm .006$ |

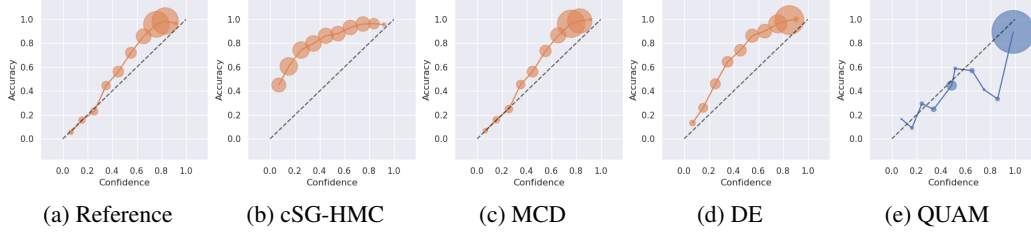

Figure C.6: Calibration: confidence vs. accuracy based on (weighted) average predictive distribution of different uncertainty quantification methods. Point size indicates number of samples in the bin.

against MC dropout used with 2048 samples with a dropout probability of 20%. The EfficientNet architectures utilize dropout only before the last layer. The adversarial model search for QUAM was performed on the last layer of the EfficientNet, which has 1.3 million trainable parameters. To enhance the computational efficiency, the output of the second-to-last layer was computed once for all samples, and this output was subsequently used as input for the final layer when performing the adversarial model search. We fixed  $c_0$  to 1 and exponentially updated it at every of the 256 update steps. Also, weight decay was fixed to  $1.e-4$  for the Adam optimizer [Kingma and Ba, 2014].

Two hyperparameters have jointly been optimized on ImageNet-O and ImageNet-A using a small grid search, with learning rate  $\alpha \in \{5.e-3, 1.e-3, 5.e-4, 1.e-4\}$  and the exponential schedule update constant  $\eta \in \{1.15, 1.01, 1.005, 1.001\}$ . The hyperparameters  $\alpha = 1.e-3$  and  $\eta = 1.01$  resulted in the overall highest performance and have thus jointly been used for each of the three experiments. This implies that  $c_0$  increases by 1% after each update step. We additionally searched for the best temperature and the best number of update steps for each experiment separately. The best temperature for scaling the cross-entropy loss when calculating Eq. (4) was identified as 0.05, 0.005, and 0.0005, while the best number of update steps was identified as 50, 100, and 100 for ImageNet-O OOD detection, ImageNet-A adversarial example detection, and ImageNet1K misclassification detection, respectively. Selective prediction was performed using the same hyperparameters as misclassification detection. We observed that the adversarial model search is relatively stable with respect to these hyperparameters.

The detailed results on various metrics and replicates of the experiments can be found in C.4. Histograms of the scores on the ID dataset and the OOD dataset, the adversarial example dataset and the correctly and incorrectly classified samples are depicted in Fig. C.7 for all methods. ROC curves, as well as accuracy over retained sample curves, are depicted in Fig. C.8. To provide confidence intervals, we performed all experiments on three distinct dataset splits of the ID datasets, matching the number of OOD samples. Therefore we used three times 2000 ID samples for Imagenet-O and three times 7000 ID samples for Imagenet-A and misclassification detection as well as selective prediction.

**Calibration.** Additionally, we analyze the calibration of QUAM compared to other baseline methods. Therefore, we compute the expected calibration error (ECE) [Guo et al., 2017] on the ImageNet-1K validation dataset using the expected predictive distribution. Regarding QUAM, the predictive distribution was obtained using the same hyperparameters as for misclassification detection reported above. We find that QUAM improves upon the other considered baseline methods, although it was not directly designed to improve the calibration of the predictive distribution. Tab. C.3 states the ECE of considered uncertainty quantification methods and in Fig. C.6 the accuracy and number of samples (depicted by the size) for specific confidence bins is depicted.

Table C.4: Detailed results of ImageNet OOD detection, adversarial example detection and misclassification experiments, reporting AUROC, AUPR and FPR@TPR=95% for individual splits.

| OOD dataset / task | Method               | Split | ↑ AUPR | ↑ AUROC | ↓ FPR@TPR=95% |
|--------------------|----------------------|-------|--------|---------|---------------|
| ImageNet-O         | Reference            | I     | 0.615  | 0.629   | 0.952         |
|                    |                      | II    | 0.600  | 0.622   | 0.953         |
|                    |                      | III   | 0.613  | 0.628   | 0.954         |
|                    | cSG-HMC              | I     | 0.671  | 0.682   | 0.855         |
|                    |                      | II    | 0.661  | 0.671   | 0.876         |
|                    |                      | III   | 0.674  | 0.679   | 0.872         |
|                    | MC dropout           | I     | 0.684  | 0.681   | 0.975         |
|                    |                      | II    | 0.675  | 0.677   | 0.974         |
|                    |                      | III   | 0.689  | 0.681   | 0.972         |
|                    | Deep Ensembles (LL)  | I     | 0.573  | 0.557   | 0.920         |
|                    |                      | II    | 0.566  | 0.562   | 0.916         |
|                    |                      | III   | 0.573  | 0.566   | 0.928         |
|                    | Deep Ensembles (all) | I     | 0.679  | 0.713   | 0.779         |
|                    |                      | II    | 0.667  | 0.703   | 0.787         |
|                    |                      | III   | 0.674  | 0.710   | 0.786         |
|                    | QUAM                 | I     | 0.729  | 0.758   | 0.766         |
|                    |                      | II    | 0.713  | 0.740   | 0.786         |
|                    |                      | III   | 0.734  | 0.761   | 0.764         |
| ImageNet-A         | Reference            | I     | 0.779  | 0.795   | 0.837         |
|                    |                      | II    | 0.774  | 0.791   | 0.838         |
|                    |                      | III   | 0.771  | 0.790   | 0.844         |
|                    | cSG-HMC              | I     | 0.800  | 0.800   | 0.785         |
|                    |                      | II    | 0.803  | 0.800   | 0.785         |
|                    |                      | III   | 0.799  | 0.798   | 0.783         |
|                    | MC dropout           | I     | 0.835  | 0.828   | 0.748         |
|                    |                      | II    | 0.832  | 0.828   | 0.740         |
|                    |                      | III   | 0.826  | 0.825   | 0.740         |
|                    | Deep Ensembles (LL)  | I     | 0.724  | 0.687   | 0.844         |
|                    |                      | II    | 0.723  | 0.685   | 0.840         |
|                    |                      | III   | 0.721  | 0.686   | 0.838         |
|                    | Deep Ensembles (all) | I     | 0.824  | 0.870   | 0.385         |
|                    |                      | II    | 0.837  | 0.877   | 0.374         |
|                    |                      | III   | 0.832  | 0.875   | 0.375         |
|                    | QUAM                 | I     | 0.859  | 0.875   | 0.470         |
|                    |                      | II    | 0.856  | 0.872   | 0.466         |
|                    |                      | III   | 0.850  | 0.870   | 0.461         |
| Misclassification  | Reference            | I     | 0.623  | 0.863   | 0.590         |
|                    |                      | II    | 0.627  | 0.875   | 0.554         |
|                    |                      | III   | 0.628  | 0.864   | 0.595         |
|                    | cSG-HMC              | I     | 0.478  | 0.779   | 0.755         |
|                    |                      | II    | 0.483  | 0.779   | 0.752         |
|                    |                      | III   | 0.458  | 0.759   | 0.780         |
|                    | MC dropout           | I     | 0.514  | 0.788   | 0.719         |
|                    |                      | II    | 0.500  | 0.812   | 0.704         |
|                    |                      | III   | 0.491  | 0.788   | 0.703         |
|                    | Deep Ensembles (LL)  | I     | 0.452  | 0.665   | 0.824         |
|                    |                      | II    | 0.421  | 0.657   | 0.816         |
|                    |                      | III   | 0.425  | 0.647   | 0.815         |
|                    | Deep Ensembles (all) | I     | 0.282  | 0.770   | 0.663         |
|                    |                      | II    | 0.308  | 0.784   | 0.650         |
|                    |                      | III   | 0.310  | 0.786   | 0.617         |
|                    | QUAM                 | I     | 0.644  | 0.901   | 0.451         |
|                    |                      | II    | 0.668  | 0.914   | 0.305         |
|                    |                      | III   | 0.639  | 0.898   | 0.399         |

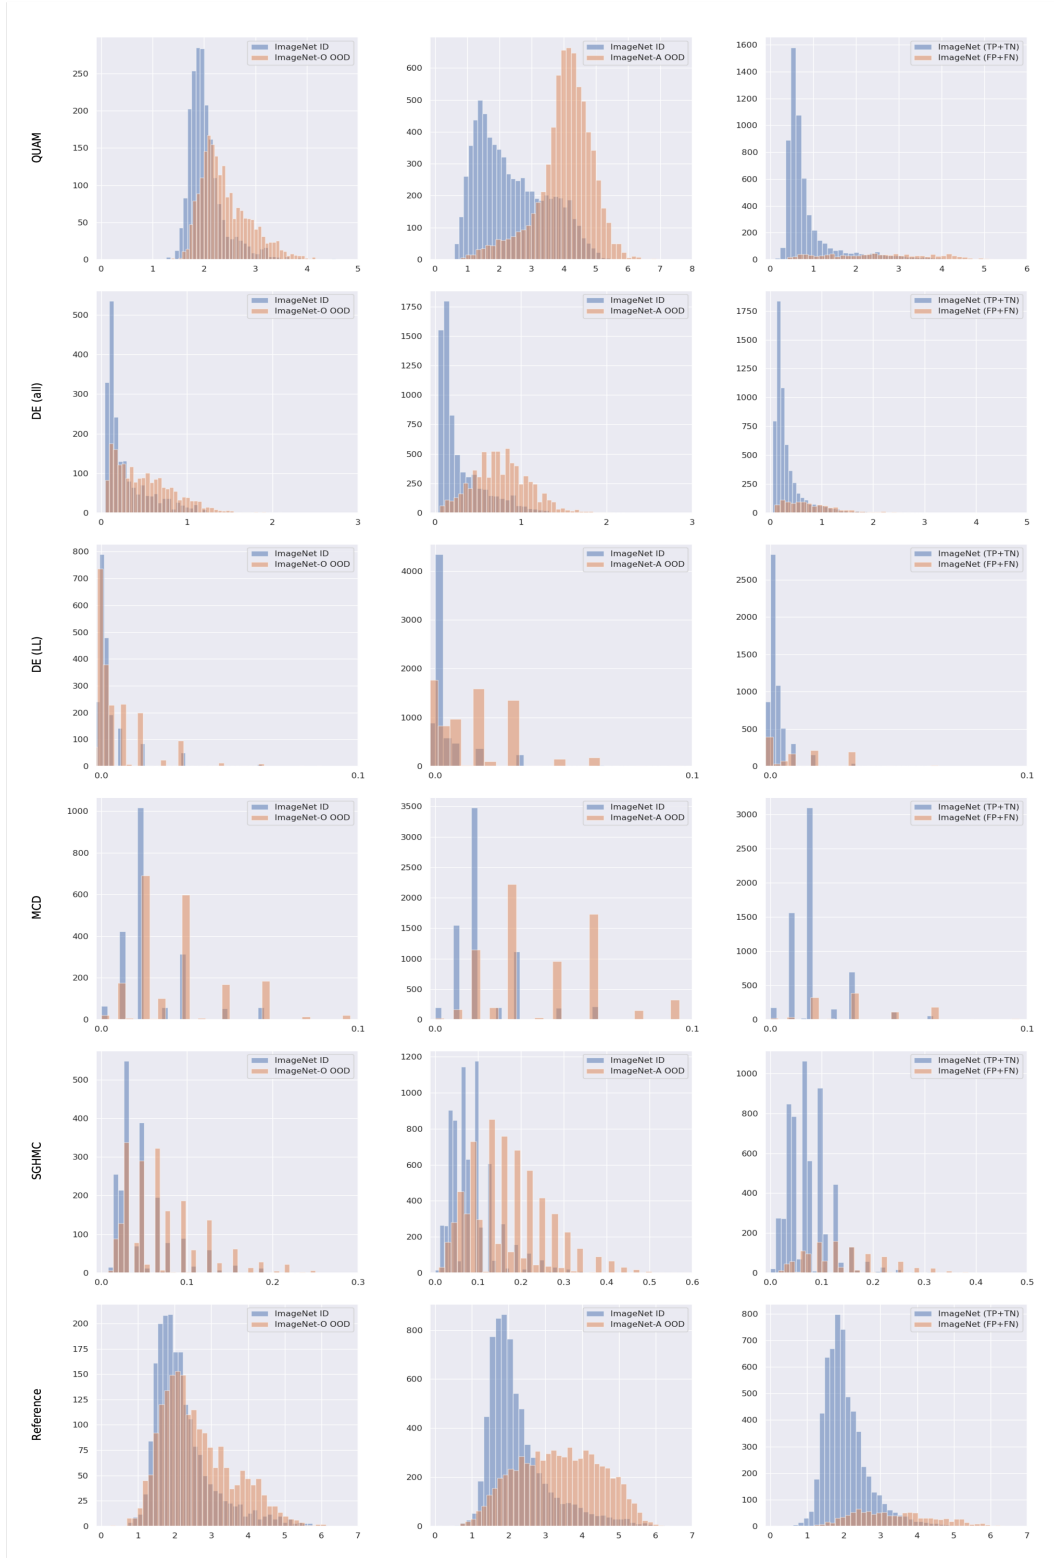

Figure C.7: ImageNet: Histograms of uncertainty scores calculated for test set samples of the specified datasets.

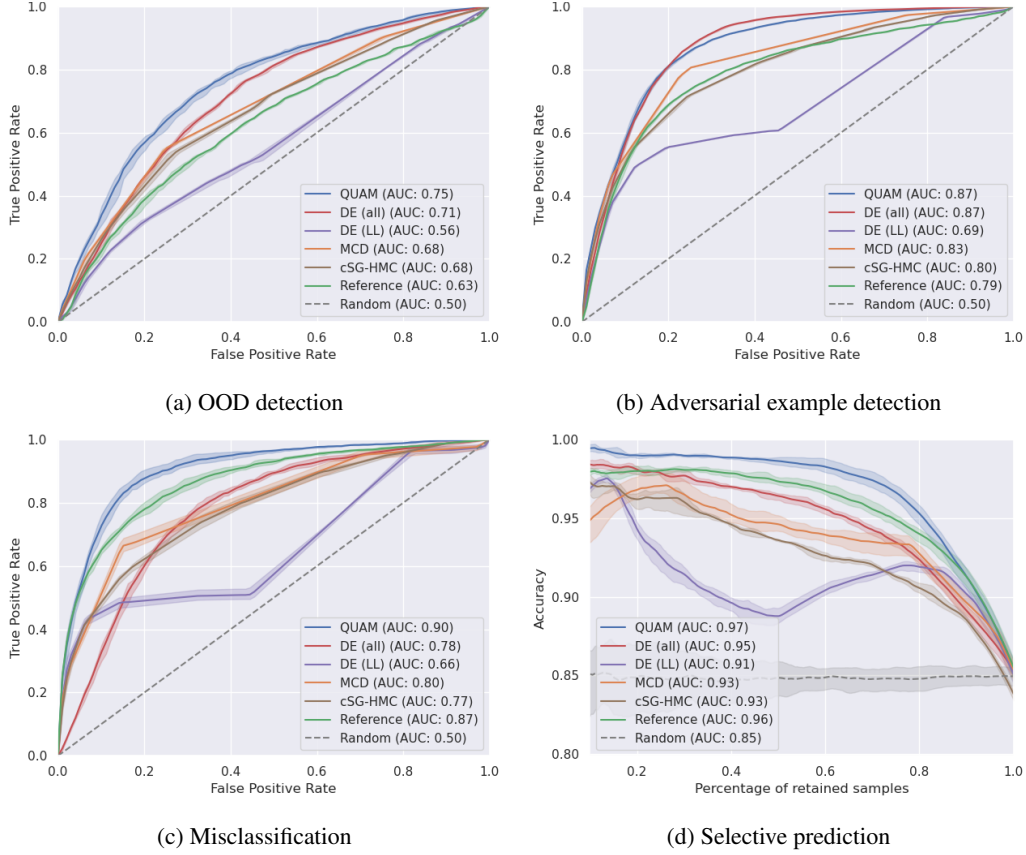

Figure C.8: ImageNet-1K OOD detection results on ImageNet-O, adversarial example detection results on ImageNet-A, misclassification detection and selective prediction results on the validation dataset. ROC curves using the epistemic uncertainty of a given, pre-selected model (as in Eq. (2)) to distinguish between (a) the ImageNet-1K validation dataset and ImageNet-O, (b) the ImageNet-1K validation dataset and ImageNet-A and (c) the reference model’s correctly and incorrectly classified samples. (d) Accuracy of reference model on subset composed of samples that exhibit lowest epistemic uncertainty.

### C.5 Comparing Mechanistic Similarity of Deep Ensembles vs. Adversarial Models

The experiments were performed on MNIST, EMNIST, and KMNIST test datasets, using 512 images of each using Deep Ensembles, and the reference model  $w$ , trained on MNIST. Results are depicted in Fig. C.9. For each image and each ensemble member, gradients were integrated over 64 steps from 64 different random normal sampled baselines for extra robustness [Sundararajan et al., 2017]. Since the procedure was also performed on the OOD sets as well as our general focus on uncertainty estimation, no true labels were used for the gradient computation. Instead, predictions of ensemble members for which the attributions were computed were used as targets. Principal Component Analysis (PCA) was performed for the attributions of each image separately, where for each pixel the attributions from different ensemble members were treated as features. The ratios of explained variance, which are normalized to sum up to one, are collected from each component. If all ensemble members would utilize mutually exclusive features for their prediction, all components would be weighted equally, leading to a straight line in the plots in the top row in Fig. C.9. Comparatively high values of the first principal component to the other components in the top row plots in Fig. C.9 indicate low diversity in features used by Deep Ensembles.

The procedure was performed similarly for an ensemble of adversarial models. The main difference was that for each image an ensemble produced as a result of an adversarial model search on that specific image was used. We observe, that ensembles of adversarial models utilize more dissimilar features, indicated by the decreased variance contribution of the first principal component. This is especially strong for ID data, but also noticeable for OOD data.

### C.6 Prediction Space Similarity of Deep Ensembles and Adversarial Models

In the following, ensembles members and adversarial models are analyzed in prediction space. We used the same Deep Ensembles as the one trained on MNIST for the OOD detection task described in Sec. C.4.1. Also, 10 adversarial models were retrieved from the reference model  $w$  and a single OOD sample (KMNIST), following the same procedure as described in Sec. C.4.1.

For the analysis, PCA was applied to the flattened softmax output vectors of each of the 20 models applied to ID validation data. The resulting points represent the variance of the model’s predictions across different principal components [Fort et al., 2019]. The results in Fig. C.10 show, that the convex hull of blue points representing adversarial models, in general, is much bigger than the convex hull of orange points representing ensemble members across the first four principal components, which explain 99.99% of the variance in prediction space. This implies that even though adversarial models achieve similar accuracy as Deep Ensembles on the validation set, they are capable of capturing more diversity in prediction space.

### C.7 Computational Expenses

**Experiments on Synthetic Datasets** The example in Sec. C.2 was computed within half an hour on a GTX 1080 Ti. Experiments on synthetic datasets shown in Sec. C.3 were also performed on a single GTX 1080 Ti. Note that the HMC baseline took approximately 14 hours on 36 CPU cores for the classification task. All other methods except QUAM finish within minutes. QUAM scales with the number of test samples. Under the utilized parameters and 6400 test samples, QUAM computation took approximately 6 hours on a single GPU and under one hour for the regression task, where the number of test points is much smaller.

**Experiments on Vision Datasets** Computational Requirements for the vision domain experiments depend a lot on the exact utilization of the baseline methods. While Deep Ensembles can take a long time to train, depending on the ensemble size, we utilized either pre-trained networks for ensembling or only trained last layers, which significantly reduces the runtime. Noteworthy, MC-dropout can result in extremely high runtimes depending on the number of forward passes and depending on the realizable batch size for inputs. The same holds for SG-HMC. Executing the QUAM experiments on MNIST (Sec. C.4.1) took a grand total of around 120 GPU-hours on a variety of mostly older generation and low-power GPUs (P40, Titan V, T4), corresponding to roughly 4 GPU-seconds per sample. Executing the experiments on ImageNet (Sec. C.4.2) took about 100 GPU-hours on a mix of A100 and A40 GPUs, corresponding to around 45 GPU-seconds per sample. The experiments presented in Sec. C.5 and C.6 took around 2 hours each on 4 GTX 1080 Ti.

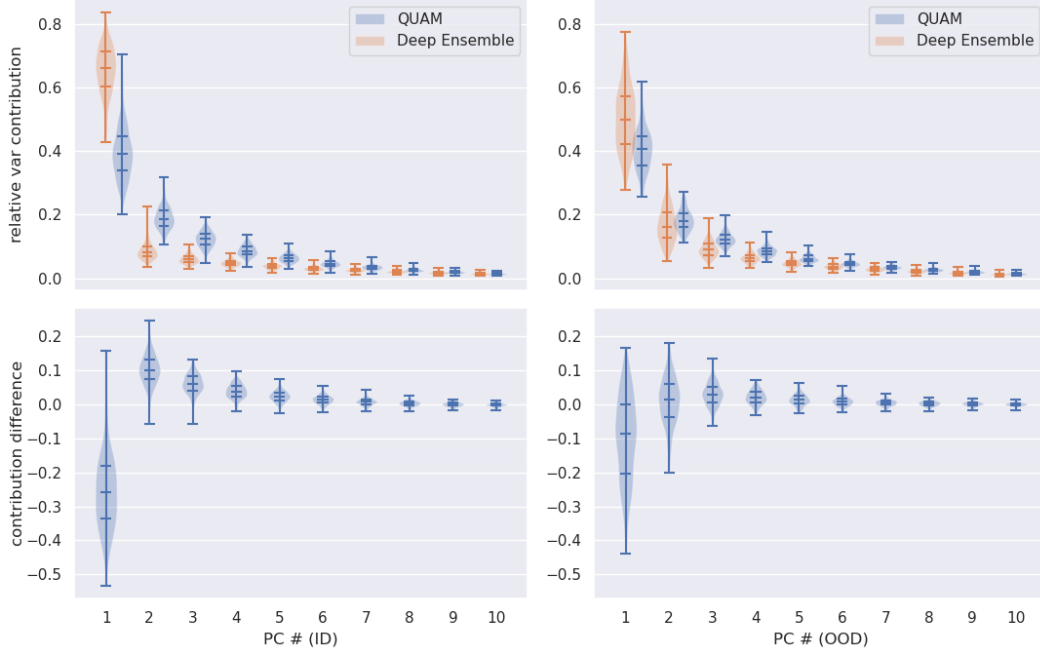

Figure C.9: The differences between significant component distribution are marginal on OOD data but pronounced on the ID data. The ID data would be subject to optimization by gradient descent during training, therefore the features are learned greedily and models are similar to each other mechanistically. We observe, that the members of Deep Ensembles show higher mechanistic similarity than the members of ensembles obtained from adversarial model search.

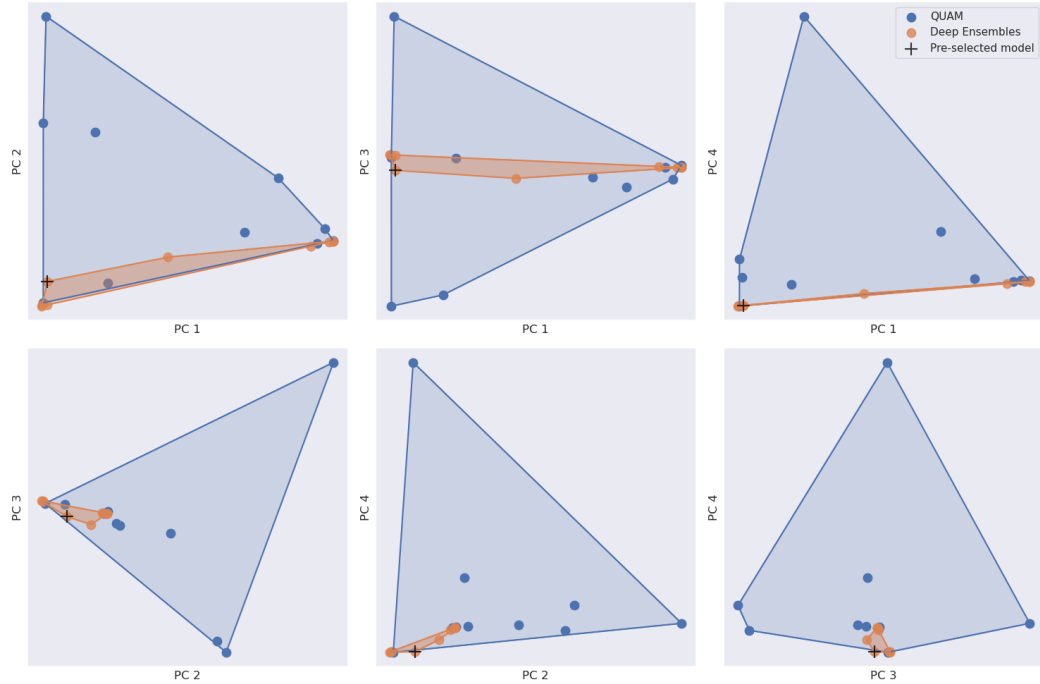

Figure C.10: Convex hull of the down-projected softmax output from 10 Ensemble Members (orange) as well as 10 adversarial models (blue). PCA is used for down-projection, all combinations of the first four principal components (99.99% variance explained) are plotted against each other. Softmax outputs are obtained on a batch of 10 random samples from the ID validation dataset. The black cross marks the given, pre-selected model  $w$ .
